# Supplementary material
Source: MDPI journal article supplement (https://www.mdpi.com/2076-3417/8/7/1208)
Supplement: s1 [file s1]

| GENERAL DATA |                |                                  |          |           |           |            |      |      |         | VULNERABILITY INDEX ASSESSMENT |                           |                     |                      |                           | EXPECTED DAMAGE ESTIMATION        |                                 |                                 |
|--------------|----------------|----------------------------------|----------|-----------|-----------|------------|------|------|---------|--------------------------------|---------------------------|---------------------|----------------------|---------------------------|-----------------------------------|---------------------------------|---------------------------------|
| FID          | REFCAT         | ADDRESS                          | COORD. X | COORD. Y  | AREA (m2) | Nº HEIGHTS | YEAR | DATA | TIP_STR | $I_V^{\min}_{ED\_IMPROV}$      | $I_V^{\min}_{ED\_IMPROV}$ | $IV^*_{ED\_IMPROV}$ | $I_V^*_{ED\_IMPROV}$ | $I_V^{\max}_{ED\_IMPROV}$ | $\mu D^*_{\_IMPROV}$<br>(I = VII) | $\mu D_{\_IMPROV}$<br>(I = VII) | $\mu D_{\_IMPROV}$<br>(I = VII) |
| 1            | 4707909XG1740F | C/Granero, 3                     | 614630   | 4170560   | 254       | 4          | 1984 | 1    | RC1     | 0.240                          | 0.430                     | 0.584               | 0.74                 | 0.96                      | 0.53                              | 0.24                            | 1.09                            |
| 2            | 4395305XG1649E | C/Guitarrista Cano, 12           | 614355.5 | 4169569.9 | 216       | 2          | 1956 | 1    | RC1     | 0.420                          | 0.610                     | 0.764               | 0.920                | 1.140                     | 1.20                              | 0.60                            | 2.12                            |
| 3            | 4600910XG1740B | C/Puerto Lumbreras, 25           | 614512   | 4169841   | 125       | 3          | 1970 | 1    | RC1     | 0.180                          | 0.370                     | 0.524               | 0.680                | 0.900                     | 0.39                              | 0.18                            | 0.83                            |
| 4            | 4699125XG1649H | C/Jerónimo de Santa Fe, 42       | 614516   | 4169773   | 518       | 4          | 2008 | 1    | RC1     | 0.180                          | 0.370                     | 0.524               | 0.680                | 0.900                     | 0.39                              | 0.18                            | 0.83                            |
| 5            | 4699125XG1649H | C/Puerto Lumbreras, 39           | 614501   | 4169773   | 518       | 2          | 2008 | 1    | RC1     | 0.220                          | 0.410                     | 0.564               | 0.720                | 0.940                     | 0.48                              | 0.22                            | 1.00                            |
| 6            | 4505218XG1740F | C/Soledad, 3                     | 614435   | 4170396   | 198       | 2          | 2007 | 1    | RC1     | 0.220                          | 0.410                     | 0.564               | 0.720                | 0.940                     | 0.48                              | 0.22                            | 1.00                            |
| 7            | 5212017XG1751A | C/Carril de Caldereros, 33       | 615113   | 4170921   | 247       | 3          | 1977 | 1    | RC1     | 0.420                          | 0.610                     | 0.764               | 0.920                | 1.140                     | 1.20                              | 0.60                            | 2.12                            |
| 8            | 4600907XG1740B | C/José Mouliá, 48                | 614535   | 4169837   | 343       | 4          | 1981 | 1    | RC1     | 0.220                          | 0.410                     | 0.564               | 0.720                | 0.940                     | 0.48                              | 0.22                            | 1.00                            |
| 9            | 4706024XG1740F | C/Narciso Yepes, 2               | 614604   | 4170327   | 264       | 4          | 1986 | 1    | RC1     | 0.400                          | 0.590                     | 0.744               | 0.900                | 1.120                     | 1.10                              | 0.55                            | 1.99                            |
| 10           | 4500021XG1740B | C/Salado, 3                      | 614385   | 4169800   | 159       | 2          | 2003 | 1    | RC1     | 0.220                          | 0.410                     | 0.564               | 0.720                | 0.940                     | 0.48                              | 0.22                            | 1.00                            |
| 11           | 6015811XG1761E | C/Galicia, 1                     | 615900   | 4171358   | 506       | 4          | 1995 | 1    | RC1     | 0.560                          | 0.750                     | 0.904               | 1.060                | 1.280                     | 2.02                              | 1.13                            | 3.06                            |
| 12           | 4395803XG1649E | C/Guitarrista Cano, 17           | 614197   | 4169328   | 180       | 2          | 1956 | 1    | RC1     | 0.340                          | 0.530                     | 0.684               | 0.840                | 1.060                     | 0.85                              | 0.41                            | 1.62                            |
| 13           | 5414703XG1751C | C/Huerca Overa, 2                | 615325   | 4171173   | 139       | 4          | 1962 | 1    | RC1     | 0.400                          | 0.590                     | 0.744               | 0.900                | 1.120                     | 1.10                              | 0.55                            | 1.99                            |
| 14           | 4915909XG1741F | C/Eulogia Perigo, 38             | 614842   | 4171337   | 61        | 4          | 1997 | 1    | RC1     | 0.180                          | 0.370                     | 0.524               | 0.680                | 0.900                     | 0.39                              | 0.18                            | 0.83                            |
| 15           | 4704614XG1740D | Avda. Portugal, 9                | 614623   | 4170207   | 149       | 4          | 1960 | 1    | RC1     | 0.420                          | 0.610                     | 0.764               | 0.920                | 1.140                     | 1.20                              | 0.60                            | 2.12                            |
| 16           | 4799021XG1649H | C/Ministro Pérez de Meca, 6      | 614618   | 4169702   | 109       | 4          | 2009 | 1    | RC1     | 0.180                          | 0.370                     | 0.524               | 0.680                | 0.900                     | 0.39                              | 0.18                            | 0.83                            |
| 17           | 6317008XG1761E | C/Francisco Salzillo, 4          | 616135   | 4171535   | 912       | 3          | 1972 | 1    | RC1     | 0.400                          | 0.590                     | 0.744               | 0.900                | 1.120                     | 1.10                              | 0.55                            | 1.99                            |
| 18           | 5395005XG1659E | Alameda de Cervantes, 85         | 615186   | 4169286   | 167       | 3          | 1980 | 1    | RC1     | 0.380                          | 0.570                     | 0.724               | 0.880                | 1.100                     | 1.01                              | 0.50                            | 1.86                            |
| 19           | 4804013XG1740D | C/Abenhalaj, 7                   | 614680   | 4170186   | 299       | 4          | 1968 | 1    | RC1     | 0.320                          | 0.510                     | 0.664               | 0.820                | 1.040                     | 0.78                              | 0.37                            | 1.50                            |
| 20           | 4697013XG1649F | C/Jerónimo de Santa Fe, 49       | 614408   | 4169525   | 674       | 4          | 1978 | 1    | RC1     | 0.340                          | 0.530                     | 0.684               | 0.840                | 1.060                     | 0.85                              | 0.41                            | 1.62                            |
| 21           | 4396301XG1649E | C/Sagrada Familia, 7             | 614266   | 4169491   | 185       | 3          | 1960 | 1    | RC1     | 0.380                          | 0.570                     | 0.724               | 0.880                | 1.100                     | 1.01                              | 0.50                            | 1.86                            |
| 22           | 5802005XG1750B | Alameda Virgen de las Huertas, 6 | 615724   | 4170004   | 411       | 3          | 1968 | 1    | RC1     | 0.400                          | 0.590                     | 0.744               | 0.900                | 1.120                     | 1.10                              | 0.55                            | 1.99                            |
| 23           | 4497608XG1649E | C/Castillo Xiquena, 1            | 614345   | 4169509   | 415       | 4          | 1994 | 1    | RC1     | 0.360                          | 0.550                     | 0.704               | 0.860                | 1.080                     | 0.93                              | 0.45                            | 1.74                            |
| 24           | 4809709XG1740H | Plaza de España, 2               | 614683   | 4170708   | 355       | 2          | 1996 | 1    | RC1     | 0.300                          | 0.490                     | 0.644               | 0.800                | 1.020                     | 0.71                              | 0.33                            | 1.39                            |
| 25           | 4293001XG1649C | C/Albañilería, 3                 | 614074   | 4169101   | 518       | 3          | 1981 | 1    | RC1     | 0.360                          | 0.550                     | 0.704               | 0.860                | 1.080                     | 0.93                              | 0.45                            | 1.74                            |
| 26           | 4606203XG1740F | C/Vicente Ruiz Llamas, 2         | 614567   | 4170479   | 342       | 2          | 1950 | 1    | RC1     | 0.500                          | 0.690                     | 0.844               | 1.000                | 1.220                     | 1.64                              | 0.87                            | 2.66                            |
| 27           | 5098103XG1659G | C/Eugenio Noel, 4                | 614919   | 4169673   | 248       | 2          | 1973 | 1    | RC1     | 0.230                          | 0.420                     | 0.574               | 0.730                | 0.950                     | 0.51                              | 0.23                            | 1.04                            |
| 28           | 4697018XG1649F | C/Jerónimo de Santa Fe, 45       | 614427   | 4169562   | 556       | 4          | 1979 | 1    | RC1     | 0.380                          | 0.570                     | 0.724               | 0.880                | 1.100                     | 1.01                              | 0.50                            | 1.86                            |
| 29           | 4909807XG1740H | C/Nuñez Arce, 9                  | 614794   | 4170708   | 136       | 2          | 1992 | 1    | RC1     | 0.260                          | 0.450                     | 0.604               | 0.760                | 0.980                     | 0.58                              | 0.27                            | 1.18                            |
| 30           | 4505807XG1740F | C/Ramblilla de San Lázaro, 23    | 614444   | 4170316   | 297       | 3          | 1970 | 1    | RC1     | 0.500                          | 0.690                     | 0.844               | 1.000                | 1.220                     | 1.64                              | 0.87                            | 2.66                            |
| 31           | 4804001XG1740D | Plaza del Negro, 1               | 614682   | 4170240   | 241       | 6          | 1976 | 1    | RC1     | 0.320                          | 0.510                     | 0.664               | 0.820                | 1.040                     | 0.78                              | 0.37                            | 1.50                            |
| 32           | 5314002XG1751C | C/Huerca Overa, 1, 3             | 615306   | 4171188   | 462       | 4          | 1950 | 1    | RC1     | 0.440                          | 0.630                     | 0.784               | 0.940                | 1.160                     | 1.30                              | 0.66                            | 2.26                            |
| 33           | 4396501XG1649E | C/Sagrada Familia, 2             | 614273   | 4169409   | 184       | 3          | 1960 | 1    | RC1     | 0.380                          | 0.570                     | 0.724               | 0.880                | 1.100                     | 1.01                              | 0.50                            | 1.86                            |
| 34           | 4193601XG1649C | C/Jardineros, 1                  | 614031   | 4169128   | 1143      | 3          | 1981 | 1    | RC1     | 0.480                          | 0.670                     | 0.824               | 0.980                | 1.200                     | 1.52                              | 0.80                            | 2.53                            |
| 35           | 5115006XG1751E | C/Alcalde Pelegrín Rodríguez, 15 | 615006   | 4171262   | 303       | 4          | 1996 | 1    | RC1     | 0.240                          | 0.430                     | 0.584               | 0.740                | 0.960                     | 0.53                              | 0.24                            | 1.09                            |
| 36           | 4498001XG1649G | C/Rambla Alta, 55                | 614210   | 4169801   | 712       | 4          | 1981 | 1    | RC1     | 0.440                          | 0.630                     | 0.784               | 0.940                | 1.160                     | 1.30                              | 0.66                            | 2.26                            |
| 37           | 6117501XG1761E | Paseo de los Angeles, 3          | 616090   | 4171534   | 1026      | 3          | 1975 | 1    | RC1     | 0.440                          | 0.630                     | 0.784               | 0.940                | 1.160                     | 1.30                              | 0.66                            | 2.26                            |
| 38           | 4605009XG1740F | C/Placica Nueva, 13              | 614480   | 4170277   | 251       | 4          | 1974 | 1    | RC1     | 0.460                          | 0.650                     | 0.804               | 0.960                | 1.180                     | 1.41                              | 0.73                            | 2.39                            |
| 39           | 6117701XG1761E | Avda. de los Ángeles, 7, 9       | 616024   | 4171528   | 539       | 3          | 1970 | 1    | RC1     | 0.200                          | 0.390                     | 0.544               | 0.700                | 0.920                     | 0.44                              | 0.20                            | 0.91                            |
| 40           | 4396801XG1649E | C/Sagrada Familia, 5             | 614220   | 4169443   | 185       | 3          | 1960 | 1    | RC1     | 0.380                          | 0.570                     | 0.724               | 0.880                | 1.100                     | 1.01                              | 0.50                            | 1.86                            |
| 41           | 6318014XG1761G | C/Francisco Salzillo, 7          | 616156   | 4171556   | 455       | 3          | 1972 | 1    | RC1     | 0.360                          | 0.550                     | 0.704               | 0.860                | 1.080                     | 0.93                              | 0.45                            | 1.74                            |
| 42           | 4599009XG1649H | C/Pérez Casas, 84                | 614390   | 4169677   | 114       | 3          | 1970 | 1    | RC1     | 0.440                          | 0.630                     | 0.784               | 0.940                | 1.160                     | 1.30                              | 0.66                            | 2.26                            |
| 43           | 4806707XG1740F | C/Corredera, 10                  | 614691   | 4170406   | 206       | 2          | 1992 | 1    | RC1     | 0.340                          | 0.530                     | 0.684               | 0.840                | 1.060                     | 0.85                              | 0.41                            | 1.62                            |
| 44           | 4498048XG1649G | C/Pérez Casas, 110               | 614316   | 4169570   | 1165      | 3          | 1978 | 1    | RC1     | 0.600                          | 0.790                     | 0.944               | 1.100                | 1.320                     | 2.28                              | 1.33                            | 3.31                            |
| 45           | 4392020XG1649A | C/Infante Juan Manuel, 9         | 614213   | 4168943   | 342       | 2          | 2001 | 1    | RC1     | 0.200                          | 0.390                     | 0.544               | 0.700                | 0.920                     | 0.44                              | 0.20                            | 0.91                            |
| 46           | 4606210XG1740F | C/Empedrada, 21                  | 614513   | 4170460   | 170       | 4          | 1972 | 1    | RC1     | 0.380                          | 0.570                     | 0.724               | 0.880                | 1.100                     | 1.01                              | 0.50                            | 1.86                            |
| 47           | 5414901XG1751C | C/Fuente Álamo, 6                | 615350   | 4171241   | 140       | 3          | 1962 | 1    | RC1     | 0.380                          | 0.570                     | 0.724               | 0.880                | 1.100                     | 1.01                              | 0.50                            | 1.86                            |
| 48           | 4810404XG1741B | C/Villaescusa, 1                 | 614789   | 4170807   | 155       | 3          | 1991 | 1    | RC1     | 0.420                          | 0.610                     | 0.764               | 0.920                | 1.140                     | 1.20                              | 0.60                            | 2.12                            |
| 49           | 3889302XG1638H | C/Enrique Zumel, 4               | 613787   | 4168782   | 187       | 2          | 2009 | 1    | RC1     | 0.300                          | 0.490                     | 0.644               | 0.800                | 1.020                     | 0.71                              | 0.33                            | 1.39                            |
| 50           | 4191105XG1649A | C/Curtidores, 18                 | 614005   | 4168937   | 435       | 4          | 1979 | 1    | RC1     | 0.440                          | 0.630                     | 0.784               | 0.940                | 1.160                     | 1.30                              | 0.66                            | 2.26                            |
| 51           | 4395304XG1649E | Ctra. Granada, 20                | 614257   | 4169350   | 216       | 2          | 1956 | 1    | RC1     | 0.420                          | 0.610                     | 0.764               | 0.920                | 1.140                     | 1.20                              | 0.60                            | 2.12                            |
| 52           | 5215007XG1751E | C/Mayor, 4                       | 615056   | 4171312   | 131       | 3          | 1960 | 1    | RC1     | 0.600                          | 0.790                     | 0.944               | 1.100                | 1.320                     | 2.28                              | 1.33                            | 3.31                            |
| 53           | 4293809XG1649C | C/Albañilería, 4                 | 614089   | 4169125   | 481       | 4          | 1974 | 1    | RC1     | 0.500                          | 0.690                     | 0.844               | 1.000                | 1.220                     | 1.64                              | 0.87                            | 2.66                            |

|     |                |                                  |        |         |      |   |      |   |     |       |       |       |       |       |      |      |      |
|-----|----------------|----------------------------------|--------|---------|------|---|------|---|-----|-------|-------|-------|-------|-------|------|------|------|
| 54  | 4698501XG1649H | C/Martín Morata, 23              | 614570 | 4169642 | 237  | 4 | 1981 | 1 | RC1 | 0.300 | 0.490 | 0.644 | 0.800 | 1.020 | 0.71 | 0.33 | 1.39 |
| 55  | 4500201XG1740B | C/Sebastián Clavijo, 3           | 614444 | 4169875 | 795  | 4 | 1979 | 1 | RC1 | 0.200 | 0.390 | 0.544 | 0.700 | 0.920 | 0.44 | 0.20 | 0.91 |
| 56  | 4915704XG1741F | C/Eulogio Períago, 31            | 614799 | 4171303 | 472  | 5 | 1983 | 1 | RC1 | 0.180 | 0.370 | 0.524 | 0.680 | 0.900 | 0.39 | 0.18 | 0.83 |
| 57  | 5214011XG1751C | C/Alcalde Pelegrín Rodríguez, 12 | 615038 | 4171253 | 396  | 4 | 1985 | 1 | RC1 | 0.300 | 0.490 | 0.644 | 0.800 | 1.020 | 0.71 | 0.33 | 1.39 |
| 58  | 4740501XG1740F | C/Narciso Yepes, 7               | 614567 | 4170315 | 246  | 3 | 1988 | 1 | RC1 | 0.360 | 0.550 | 0.704 | 0.860 | 1.080 | 0.93 | 0.45 | 1.74 |
| 59  | 4594706XG1649D | C/Camino Viejo del Puerto, 35    | 614426 | 4169197 | 226  | 4 | 1977 | 1 | RC1 | 0.380 | 0.570 | 0.724 | 0.880 | 1.100 | 1.01 | 0.50 | 1.86 |
| 60  | 4395804XG1649E | C/Guitarrista Cano, 18           | 614190 | 4169316 | 180  | 2 | 1956 | 1 | RC1 | 0.420 | 0.610 | 0.764 | 0.920 | 1.140 | 1.20 | 0.60 | 2.12 |
| 61  | 4499204XG1649G | C/Rambla Alta, 13                | 614363 | 4169771 | 100  | 3 | 1965 | 1 | RC1 | 0.520 | 0.710 | 0.864 | 1.020 | 1.240 | 1.76 | 0.95 | 2.80 |
| 62  | 4603002XG1740D | C/Redón, 12                      | 614503 | 4170151 | 161  | 2 | 2006 | 1 | RC1 | 0.180 | 0.370 | 0.524 | 0.680 | 0.900 | 0.39 | 0.18 | 0.83 |
| 63  | 5009810XG1750G | C/Corredera, 50                  | 614874 | 4170731 | 117  | 2 | 1910 | 1 | RC1 | 0.220 | 0.410 | 0.564 | 0.720 | 0.940 | 0.48 | 0.22 | 1.00 |
| 64  | 6117701XG1761E | Avda. de los Ángeles, 7, 9       | 616021 | 4171527 | 539  | 3 | 1970 | 1 | RC1 | 0.480 | 0.670 | 0.824 | 0.980 | 1.200 | 1.52 | 0.80 | 2.53 |
| 65  | 4804601XG1740D | C/Santa Paula, 1                 | 614705 | 4170247 | 127  | 4 | 1973 | 1 | RC1 | 0.420 | 0.610 | 0.764 | 0.920 | 1.140 | 1.20 | 0.60 | 2.12 |
| 66  | 5415006XG1751E | Avda. Rafael Maroto, 13          | 615399 | 4171185 | 145  | 4 | 1979 | 1 | RC1 | 0.340 | 0.530 | 0.684 | 0.840 | 1.060 | 0.85 | 0.41 | 1.62 |
| 67  | 4604907XG1740D | C/Bordadora Ángela Morales, 1    | 614568 | 4170232 | 216  | 4 | 1978 | 1 | RC1 | 0.440 | 0.630 | 0.784 | 0.940 | 1.160 | 1.30 | 0.66 | 2.26 |
| 68  | 5212001XG1751A | Avda. Santa Clara, 2             | 615014 | 4171079 | 239  | 3 | 1964 | 1 | RC1 | 0.540 | 0.730 | 0.884 | 1.040 | 1.260 | 1.89 | 1.04 | 2.93 |
| 69  | 4598251XG1649H | C/Pérez Casas, 83                | 614435 | 4169703 | 277  | 4 | 2002 | 1 | RC1 | 0.160 | 0.350 | 0.504 | 0.660 | 0.880 | 0.36 | 0.16 | 0.76 |
| 70  | 4499313XG1649G | C/Marqués de los Vélez, 8        | 614377 | 4169762 | 111  | 3 | 2007 | 1 | RC1 | 0.280 | 0.470 | 0.624 | 0.780 | 1.000 | 0.64 | 0.30 | 1.28 |
| 71  | 5004807XG1750C | Alameda de Menchirón, 7          | 614898 | 4170211 | 509  | 4 | 1982 | 1 | RC1 | 0.380 | 0.570 | 0.724 | 0.880 | 1.100 | 1.01 | 0.50 | 1.86 |
| 72  | 5115204XG1751E | C/Higuera, 3                     | 615049 | 4171347 | 131  | 3 | 2003 | 1 | RC1 | 0.220 | 0.410 | 0.564 | 0.720 | 0.940 | 0.48 | 0.22 | 1.00 |
| 73  | 4497615XG1649E | C/Benemérita, 6                  | 614314 | 4169491 | 160  | 4 | 1970 | 1 | RC1 | 0.340 | 0.530 | 0.684 | 0.840 | 1.060 | 0.85 | 0.41 | 1.62 |
| 74  | 4907001XG1740F | C/General Terrer Leonés, 2       | 614758 | 4170540 | 175  | 4 | 1974 | 1 | RC1 | 0.500 | 0.690 | 0.844 | 1.000 | 1.220 | 1.64 | 0.87 | 2.66 |
| 75  | 5311021XG1751A | C/Carril de Caldereros, 26       | 615071 | 4170868 | 894  | 3 | 1991 | 1 | RC1 | 0.480 | 0.670 | 0.824 | 0.980 | 1.200 | 1.52 | 0.80 | 2.53 |
| 76  | 4705021XG1740F | C/Cueto, 6                       | 614565 | 4170291 | 220  | 2 | 1988 | 1 | RC1 | 0.260 | 0.450 | 0.604 | 0.760 | 0.980 | 0.58 | 0.27 | 1.18 |
| 77  | 4400410XG1740A | Travesía de Guevara, 13          | 614339 | 4169836 | 60   | 2 | 1975 | 1 | RC1 | 0.380 | 0.570 | 0.724 | 0.880 | 1.100 | 1.01 | 0.50 | 1.86 |
| 78  | 5118908XG1751G | C/Abellaneda, 77                 | 615026 | 4171644 | 148  | 3 | 2010 | 1 | RC1 | 0.260 | 0.450 | 0.604 | 0.760 | 0.980 | 0.58 | 0.27 | 1.18 |
| 79  | 5414902XG1751C | C/Fuente Álamo, 4                | 615331 | 4171238 | 139  | 3 | 1962 | 1 | RC1 | 0.380 | 0.570 | 0.724 | 0.880 | 1.100 | 1.01 | 0.50 | 1.86 |
| 80  | 6119501XG1761G | C/Escritor Alfonso Espejo, 3     | 616075 | 4171711 | 1188 | 4 | 1972 | 1 | RC1 | 0.400 | 0.590 | 0.744 | 0.900 | 1.120 | 1.10 | 0.55 | 1.99 |
| 81  | 5215912XG1751E | C/Mayor, 35                      | 615156 | 4171348 | 140  | 3 | 1957 | 1 | RC1 | 0.400 | 0.590 | 0.744 | 0.900 | 1.120 | 1.10 | 0.55 | 1.99 |
| 82  | 4701001XG1740B | C/Cañete, 1                      | 614582 | 4169916 | 290  | 3 | 2003 | 1 | RC1 | 0.260 | 0.450 | 0.604 | 0.760 | 0.980 | 0.58 | 0.27 | 1.18 |
| 83  | 5314908XG1751C | C/Charco, 12                     | 615116 | 4171271 | 191  | 3 | 1972 | 1 | RC1 | 0.420 | 0.610 | 0.764 | 0.920 | 1.140 | 1.20 | 0.60 | 2.12 |
| 84  | 4400510XG1740A | C/Rambla Alta, 22                | 614352 | 4169790 | 189  | 3 | 1990 | 1 | RC1 | 0.300 | 0.490 | 0.644 | 0.800 | 1.020 | 0.71 | 0.33 | 1.39 |
| 85  | 4502215XG1740B | C/Franco, 29                     | 614443 | 4170092 | 120  | 3 | 1984 | 1 | RC1 | 0.280 | 0.470 | 0.624 | 0.780 | 1.000 | 0.64 | 0.30 | 1.28 |
| 86  | 6119801XG1761G | C/Escritor Alfonso Espejo, 1     | 616020 | 4171730 | 789  | 4 | 1972 | 1 | RC1 | 0.380 | 0.570 | 0.724 | 0.880 | 1.100 | 1.01 | 0.50 | 1.86 |
| 87  | 4601019XG1740B | C/Pérez Casas, 37                | 614488 | 4169897 | 248  | 4 | 1997 | 1 | RC1 | 0.200 | 0.390 | 0.544 | 0.700 | 0.920 | 0.44 | 0.20 | 0.91 |
| 88  | 4500208XG1740B | Plaza San José, 5                | 614410 | 4169856 | 224  | 4 | 1990 | 1 | RC1 | 0.320 | 0.510 | 0.664 | 0.820 | 1.040 | 0.78 | 0.37 | 1.50 |
| 89  | 4392019XG1649A | C/Camino Viejo del Puerto, 72    | 614265 | 4169058 | 586  | 2 | 2000 | 1 | RC1 | 0.400 | 0.590 | 0.744 | 0.900 | 1.120 | 1.10 | 0.55 | 1.99 |
| 90  | 4601024XG1740B | C/Pérez Casas, 27                | 614500 | 4169937 | 146  | 4 | 1978 | 1 | RC1 | 0.340 | 0.530 | 0.684 | 0.840 | 1.060 | 0.85 | 0.41 | 1.62 |
| 91  | 5814701XG1751D | Avda. Europa, 30                 | 615782 | 4171218 | 920  | 4 | 2000 | 1 | RC1 | 0.180 | 0.370 | 0.524 | 0.680 | 0.900 | 0.39 | 0.18 | 0.83 |
| 92  | 4698502XG1649H | Travesía Martín Morata, 2        | 614585 | 4169642 | 183  | 3 | 1996 | 1 | RC1 | 0.420 | 0.610 | 0.764 | 0.920 | 1.140 | 1.20 | 0.60 | 2.12 |
| 93  | 4495041XG1649E | Ctra. Granada, 17                | 614325 | 4169397 | 214  | 4 | 2008 | 1 | RC1 | 0.180 | 0.370 | 0.524 | 0.680 | 0.900 | 0.39 | 0.18 | 0.83 |
| 94  | 4505202XG1740F | C/Los Guiraos, 5                 | 614457 | 4170400 | 144  | 4 | 1978 | 1 | RC1 | 0.380 | 0.570 | 0.724 | 0.880 | 1.100 | 1.01 | 0.50 | 1.86 |
| 95  | 4396601XG1649E | C/Músico Pérez de Tudela, 3      | 614227 | 4169410 | 178  | 2 | 1955 | 1 | RC1 | 0.420 | 0.610 | 0.764 | 0.920 | 1.140 | 1.20 | 0.60 | 2.12 |
| 96  | 4696008XG1649F | C/Joaquín Sorolla, 9             | 614530 | 4169517 | 536  | 2 | 2001 | 1 | RC1 | 0.280 | 0.470 | 0.624 | 0.780 | 1.000 | 0.64 | 0.30 | 1.28 |
| 97  | 4700005XG1740B | C/Fray Diego de Cádiz, 9         | 614596 | 4169768 | 205  | 2 | 1998 | 1 | RC1 | 0.300 | 0.490 | 0.644 | 0.800 | 1.020 | 0.71 | 0.33 | 1.39 |
| 98  | 4497604XG1649E | C/Castillo Xiquena, 9            | 614292 | 4169516 | 322  | 3 | 2006 | 1 | RC1 | 0.220 | 0.410 | 0.564 | 0.720 | 0.940 | 0.48 | 0.22 | 1.00 |
| 99  | 5107209XG1750E | Travesía Ramón y Cajal, 1        | 615037 | 4170551 | 583  | 2 | 1985 | 1 | RC1 | 0.280 | 0.470 | 0.624 | 0.780 | 1.000 | 0.64 | 0.30 | 1.28 |
| 100 | 4395303XG1649E | Ctra. Granada, 18                | 614263 | 4169364 | 216  | 2 | 1956 | 1 | RC1 | 0.340 | 0.530 | 0.684 | 0.840 | 1.060 | 0.85 | 0.41 | 1.62 |
| 101 | 4698109XG1649H | C/Jerónimo de Santa Fe, 33       | 614507 | 4169698 | 349  | 4 | 1970 | 1 | RC1 | 0.500 | 0.690 | 0.844 | 1.000 | 1.220 | 1.64 | 0.87 | 2.66 |
| 102 | 6015814XG1761E | Avda. Fuerzas Armadas, 6         | 615910 | 4171383 | 84   | 3 | 1965 | 1 | RC1 | 0.440 | 0.630 | 0.784 | 0.940 | 1.160 | 1.30 | 0.66 | 2.26 |
| 103 | 4498003XG1649G | C/Rambla Alta, 49                | 614243 | 4169793 | 671  | 3 | 1979 | 1 | RC1 | 0.480 | 0.670 | 0.824 | 0.980 | 1.200 | 1.52 | 0.80 | 2.53 |
| 104 | 4495043XG1649E | Ctra. Granada, 13                | 614337 | 4169407 | 133  | 4 | 1994 | 1 | RC1 | 0.260 | 0.450 | 0.604 | 0.760 | 0.980 | 0.58 | 0.27 | 1.18 |
| 105 | 4698107XG1649H | C/Jerónimo de Santa Fe, 37       | 614474 | 4169645 | 326  | 4 | 1976 | 1 | RC1 | 0.300 | 0.490 | 0.644 | 0.800 | 1.020 | 0.71 | 0.33 | 1.39 |
| 106 | 4396604XG1649E | C/Guitarrista Cano, 8            | 614226 | 4169377 | 178  | 2 | 1955 | 1 | RC1 | 0.420 | 0.610 | 0.764 | 0.920 | 1.140 | 1.20 | 0.60 | 2.12 |
| 107 | 4293803XG1649C | C/Carpintería, 5                 | 614093 | 4169149 | 152  | 3 | 1975 | 1 | RC1 | 0.420 | 0.610 | 0.764 | 0.920 | 1.140 | 1.20 | 0.60 | 2.12 |
| 108 | 4397501XG1649E | C/Sagrada Familia, 6             | 614253 | 4169499 | 184  | 3 | 1960 | 1 | RC1 | 0.380 | 0.570 | 0.724 | 0.880 | 1.100 | 1.01 | 0.50 | 1.86 |
| 109 | 6318012XG1761G | C/Francisco Salzillo, 11         | 616186 | 4171561 | 183  | 3 | 1984 | 1 | RC1 | 0.260 | 0.450 | 0.604 | 0.760 | 0.980 | 0.58 | 0.27 | 1.18 |
| 110 | 6015805XG1761E | Paseo de Guerra, 10              | 615926 | 4171320 | 150  | 4 | 1996 | 1 | RC1 | 0.160 | 0.350 | 0.504 | 0.660 | 0.880 | 0.36 | 0.16 | 0.76 |

|     |                |                                  |        |         |      |   |      |   |     |       |       |       |       |       |      |      |      |
|-----|----------------|----------------------------------|--------|---------|------|---|------|---|-----|-------|-------|-------|-------|-------|------|------|------|
| 111 | 5802004XG1750B | Alameda Virgen de las Huertas, 4 | 615711 | 4170015 | 337  | 1 | 1987 | 1 | RC1 | 0.260 | 0.450 | 0.604 | 0.760 | 0.980 | 0.58 | 0.27 | 1.18 |
| 112 | 4393101XG1649C | Ctra. Granada, 59                | 614220 | 4169166 | 2020 | 4 | 1992 | 1 | RC1 | 0.500 | 0.690 | 0.844 | 1.000 | 1.220 | 1.64 | 0.87 | 2.66 |
| 113 | 4393002XG1649C | C/Infante Juan Manuel, 5         | 614143 | 4168985 | 400  | 2 | 2002 | 1 | RC1 | 0.280 | 0.470 | 0.624 | 0.780 | 1.000 | 0.64 | 0.30 | 1.28 |
| 114 | 4396606XG1649E | C/Músico Pérez de Tudela, 5      | 614219 | 4169398 | 178  | 2 | 1955 | 1 | RC1 | 0.340 | 0.530 | 0.684 | 0.840 | 1.060 | 0.85 | 0.41 | 1.62 |
| 115 | 5414702XG1751C | C/Huercal Overa, 4               | 615322 | 4171190 | 139  | 4 | 1962 | 1 | RC1 | 0.300 | 0.490 | 0.644 | 0.800 | 1.020 | 0.71 | 0.33 | 1.39 |
| 116 | 4806015XG1740F | C/Cuesta de San Francisco, 1     | 614649 | 4170351 | 253  | 3 | 2008 | 1 | RC1 | 0.320 | 0.510 | 0.664 | 0.820 | 1.040 | 0.78 | 0.37 | 1.50 |
| 117 | 4396401XG1649E | C/Sagrada Familia, 3             | 614254 | 4169420 | 185  | 3 | 1960 | 1 | RC1 | 0.380 | 0.570 | 0.724 | 0.880 | 1.100 | 1.01 | 0.50 | 1.86 |
| 118 | 6117501XG1761E | C/Escultor Nicolás de Bussy, 2   | 616089 | 4171532 | 1026 | 3 | 1975 | 1 | RC1 | 0.460 | 0.650 | 0.804 | 0.960 | 1.180 | 1.41 | 0.73 | 2.39 |
| 119 | 6118501XG1761G | C/Pintor Luis Tórner, 4, 6, 8    | 616083 | 4171632 | 1123 | 3 | 1977 | 1 | RC1 | 0.480 | 0.670 | 0.824 | 0.980 | 1.200 | 1.52 | 0.80 | 2.53 |
| 120 | 4293202XG1649C | C/Zapateros, 12                  | 614117 | 4169166 | 338  | 4 | 1969 | 1 | RC1 | 0.420 | 0.610 | 0.764 | 0.920 | 1.140 | 1.20 | 0.60 | 2.12 |
| 121 | 4503709XG1740D | C/Franco, 34                     | 614421 | 4170088 | 375  | 2 | 1980 | 1 | RC1 | 0.380 | 0.570 | 0.724 | 0.880 | 1.100 | 1.01 | 0.50 | 1.86 |
| 122 | 6116301XG1761E | Avda. de los Ángeles, 2, 4, 6    | 616056 | 4171482 | 568  | 3 | 1970 | 1 | RC1 | 0.440 | 0.630 | 0.784 | 0.940 | 1.160 | 1.30 | 0.66 | 2.26 |
| 123 | 4806011XG1740F | Plaza de la Concordia, 2         | 614661 | 4170368 | 408  | 2 | 1940 | 1 | RC1 | 0.380 | 0.570 | 0.724 | 0.880 | 1.100 | 1.01 | 0.50 | 1.86 |
| 124 | 4395002XG1649E | C/Río Guadalentín, 1             | 614189 | 4169291 | 870  | 2 | 1989 | 1 | RC1 | 0.280 | 0.470 | 0.624 | 0.780 | 1.000 | 0.64 | 0.30 | 1.28 |
| 125 | 4705003XG1740F | C/Narciso Yepes, 23              | 614513 | 4170333 | 219  | 3 | 1980 | 1 | RC1 | 0.360 | 0.550 | 0.704 | 0.860 | 1.080 | 0.93 | 0.45 | 1.74 |
| 126 | 4799027XG1649H | C/Martin Morata, 15              | 614567 | 4169701 | 319  | 4 | 1991 | 1 | RC1 | 0.220 | 0.410 | 0.564 | 0.720 | 0.940 | 0.48 | 0.22 | 1.00 |
| 127 | 5215940XG1751E | C/Mayor, 3                       | 615065 | 4171348 | 685  | 4 | 2010 | 1 | RC1 | 0.300 | 0.490 | 0.644 | 0.800 | 1.020 | 0.71 | 0.33 | 1.39 |
| 128 | 4799025XG1649H | C/Martin Morata, 21              | 614567 | 4169662 | 220  | 2 | 1970 | 1 | RC1 | 0.420 | 0.610 | 0.764 | 0.920 | 1.140 | 1.20 | 0.60 | 2.12 |
| 129 | 4910203XG1741B | C/Juan de Toledo, 1              | 614843 | 4170854 | 156  | 3 | 1973 | 1 | RC1 | 0.440 | 0.630 | 0.784 | 0.940 | 1.160 | 1.30 | 0.66 | 2.26 |
| 130 | 4905003XG1740F | C/Poeta Carlos Mellado, 6        | 614825 | 4170285 | 203  | 4 | 1965 | 1 | RC1 | 0.220 | 0.410 | 0.564 | 0.720 | 0.940 | 0.48 | 0.22 | 1.00 |
| 131 | 4497614XG1649E | C/Benemérita, 4                  | 614321 | 4169486 | 208  | 3 | 1969 | 1 | RC1 | 0.360 | 0.550 | 0.704 | 0.860 | 1.080 | 0.93 | 0.45 | 1.74 |
| 132 | 4395806XG1649E | C/Músico Pérez de Tudela, 11     | 614183 | 4169335 | 180  | 2 | 1956 | 1 | RC1 | 0.340 | 0.530 | 0.684 | 0.840 | 1.060 | 0.85 | 0.41 | 1.62 |
| 133 | 6118101XG1761G | Avda. de los Ángeles, 27, 29, 31 | 616000 | 4171695 | 854  | 3 | 1975 | 1 | RC1 | 0.380 | 0.570 | 0.724 | 0.880 | 1.100 | 1.01 | 0.50 | 1.86 |
| 134 | 4395805XG1649E | C/Músico Pérez de Tudela, 13     | 614175 | 4169323 | 180  | 2 | 1956 | 1 | RC1 | 0.420 | 0.610 | 0.764 | 0.920 | 1.140 | 1.20 | 0.60 | 2.12 |
| 135 | 4704602XG1740D | C/Abenhalaj, 2, 4                | 614642 | 4170236 | 1123 | 3 | 1985 | 1 | RC1 | 0.340 | 0.530 | 0.684 | 0.840 | 1.060 | 0.85 | 0.41 | 1.62 |
| 136 | 4707901XG1740F | C/Granero, 1                     | 614646 | 4170583 | 512  | 4 | 1982 | 1 | RC1 | 0.280 | 0.470 | 0.624 | 0.780 | 1.000 | 0.64 | 0.30 | 1.28 |
| 137 | 4703021XG1740D | C/José Mouliá, 7                 | 614568 | 4170036 | 392  | 3 | 1975 | 1 | RC1 | 0.460 | 0.650 | 0.804 | 0.960 | 1.180 | 1.41 | 0.73 | 2.39 |
| 138 | 4193801XG1649C | C/Panadería, 1                   | 614001 | 4169141 | 1093 | 3 | 1977 | 1 | RC1 | 0.460 | 0.650 | 0.804 | 0.960 | 1.180 | 1.41 | 0.73 | 2.39 |
| 139 | 5815918XG1751F | C/Riego, 1                       | 615775 | 4171340 | 365  | 4 | 2002 | 1 | RC1 | 0.440 | 0.630 | 0.784 | 0.940 | 1.160 | 1.30 | 0.66 | 2.26 |
| 140 | 4499301XG1649G | C/Rambla Alta, 11                | 614384 | 4169770 | 124  | 3 | 1985 | 1 | RC1 | 0.360 | 0.550 | 0.704 | 0.860 | 1.080 | 0.93 | 0.45 | 1.74 |
| 141 | 4594704XG1649D | C/Camino Viejo del Puerto, 39    | 614385 | 4169206 | 208  | 3 | 1977 | 1 | RC1 | 0.340 | 0.530 | 0.684 | 0.840 | 1.060 | 0.85 | 0.41 | 1.62 |
| 142 | 4910202XG1741B | C/Marsilla, 1                    | 614848 | 4170863 | 109  | 3 | 1995 | 1 | RC1 | 0.260 | 0.450 | 0.604 | 0.760 | 0.980 | 0.58 | 0.27 | 1.18 |
| 143 | 4505916XG1740F | C/José María Zarauz, 19          | 614423 | 4170357 | 242  | 3 | 2009 | 1 | RC1 | 0.220 | 0.410 | 0.564 | 0.720 | 0.940 | 0.48 | 0.22 | 1.00 |
| 144 | 6117502XG1761E | C/Severo Ochoa, 1                | 616047 | 4171515 | 168  | 2 | 1975 | 1 | RC1 | 0.400 | 0.590 | 0.744 | 0.900 | 1.120 | 1.10 | 0.55 | 1.99 |
| 145 | 6317008XG1761E | C/Francisco Salzillo, 2          | 616118 | 4171531 | 912  | 3 | 1972 | 1 | RC1 | 0.440 | 0.630 | 0.784 | 0.940 | 1.160 | 1.30 | 0.66 | 2.26 |
| 146 | 4697003XG1649F | C/La Seda, 4                     | 614530 | 4169560 | 544  | 4 | 1991 | 1 | RC1 | 0.240 | 0.430 | 0.584 | 0.740 | 0.960 | 0.53 | 0.24 | 1.09 |
| 147 | 4396605XG1649E | C/Música Pérez de Tudela, 7      | 614214 | 4169385 | 178  | 2 | 1955 | 1 | RC1 | 0.420 | 0.610 | 0.764 | 0.920 | 1.140 | 1.20 | 0.60 | 2.12 |
| 148 | 5311016XG1751A | Avda. Juan Carlos I, 49          | 615102 | 4170747 | 3608 | 8 | 1980 | 1 | RC1 | 0.320 | 0.510 | 0.664 | 0.820 | 1.040 | 0.78 | 0.37 | 1.50 |
| 149 | 6218101XG1761G | C/Juan Ramon Jiménez, 6          | 616100 | 4171680 | 176  | 2 | 1986 | 1 | RC1 | 0.400 | 0.590 | 0.744 | 0.900 | 1.120 | 1.10 | 0.55 | 1.99 |
| 150 | 4498407XG1649G | C/Pérez Casas, 96                | 614376 | 4169629 | 199  | 4 | 1980 | 1 | RC1 | 0.320 | 0.510 | 0.664 | 0.820 | 1.040 | 0.78 | 0.37 | 1.50 |
| 151 | 4695007XG1649F | C/Camino Viejo del Puerto, 33    | 614416 | 4169216 | 225  | 4 | 1976 | 1 | RC1 | 0.300 | 0.490 | 0.644 | 0.800 | 1.020 | 0.71 | 0.33 | 1.39 |
| 152 | 4703014XG1740D | C/Juan XXIII, 2                  | 614624 | 4170086 | 180  | 3 | 2002 | 1 | RC1 | 0.180 | 0.370 | 0.524 | 0.680 | 0.900 | 0.39 | 0.18 | 0.83 |
| 153 | 4705016XG1740F | C/Nogalte, 14                    | 614593 | 4170292 | 285  | 2 | 1940 | 1 | RC1 | 0.540 | 0.730 | 0.884 | 1.040 | 1.260 | 1.89 | 1.04 | 2.93 |
| 154 | 4295012XG1649E | C/Rambla de las Chatas, 8        | 614081 | 4169315 | 606  | 1 | 2002 | 1 | RC1 | 0.200 | 0.390 | 0.544 | 0.700 | 0.920 | 0.44 | 0.20 | 0.91 |
| 155 | 4600019XG1740B | C/Pérez Casas, 71                | 614448 | 4169759 | 161  | 4 | 1986 | 1 | RC1 | 0.240 | 0.430 | 0.584 | 0.740 | 0.960 | 0.53 | 0.24 | 1.09 |
| 156 | 4598243XG1649H | C/Pérez Casas, 99                | 614421 | 4169657 | 174  | 4 | 1995 | 1 | RC1 | 0.300 | 0.490 | 0.644 | 0.800 | 1.020 | 0.71 | 0.33 | 1.39 |
| 157 | 4395801XG1649E | C/Músico Pérez de Tudela, 9      | 614189 | 4169346 | 180  | 2 | 1956 | 1 | RC1 | 0.420 | 0.610 | 0.764 | 0.920 | 1.140 | 1.20 | 0.60 | 2.12 |
| 158 | 4703001XG1740D | C/Nogalte, 15                    | 614591 | 4170212 | 240  | 4 | 1987 | 1 | RC1 | 0.400 | 0.590 | 0.744 | 0.900 | 1.120 | 1.10 | 0.55 | 1.99 |
| 159 | 5311012XG1751A | Avda. Juan Carlos I, 59          | 615144 | 4170820 | 356  | 4 | 1966 | 1 | RC1 | 0.280 | 0.470 | 0.624 | 0.780 | 1.000 | 0.64 | 0.30 | 1.28 |
| 160 | 5415024XG1751E | C/Puente Gimeno, 8, 10, 12       | 615398 | 4171224 | 1159 | 4 | 2000 | 1 | RC1 | 0.220 | 0.410 | 0.564 | 0.720 | 0.940 | 0.48 | 0.22 | 1.00 |
| 161 | 4807906XG1740F | C/Pérez de Hita, 6               | 614721 | 4170553 | 70   | 2 | 1930 | 1 | RC1 | 0.540 | 0.730 | 0.884 | 1.040 | 1.260 | 1.89 | 1.04 | 2.93 |
| 162 | 5001001XG1750A | Alameda Rafael Méndez, 2         | 614919 | 4169953 | 1278 | 9 | 1982 | 1 | RC1 | 0.240 | 0.430 | 0.584 | 0.740 | 0.960 | 0.53 | 0.24 | 1.09 |
| 163 | 4905017XG1740F | Plaza Colón, 3                   | 614768 | 4170275 | 574  | 2 | 1930 | 1 | RC1 | 0.600 | 0.790 | 0.944 | 1.100 | 1.320 | 2.28 | 1.33 | 3.31 |
| 164 | 5110014XG1751A | Travesía Juan Carlos I, 1        | 615013 | 4170727 | 5078 | 6 | 1981 | 1 | RC1 | 0.280 | 0.470 | 0.624 | 0.780 | 1.000 | 0.64 | 0.30 | 1.28 |
| 165 | 4598254XG1649H | C/Pérez Casas, 51                | 614466 | 4169811 | 609  | 4 | 2009 | 1 | RC1 | 0.540 | 0.730 | 0.884 | 1.040 | 1.260 | 1.89 | 1.04 | 2.93 |
| 166 | 6118102XG1761G | Avda. de los Ángeles, 23, 25     | 616003 | 4171652 | 578  | 3 | 1972 | 1 | RC1 | 0.480 | 0.670 | 0.824 | 0.980 | 1.200 | 1.52 | 0.80 | 2.53 |
| 167 | 5000602XG1750A | Alameda de Cervantes, 19         | 614948 | 4169781 | 1086 | 5 | 1976 | 1 | RC1 | 0.600 | 0.790 | 0.944 | 1.100 | 1.320 | 2.28 | 1.33 | 3.31 |

|     |                |                                 |        |         |      |    |      |   |     |       |       |       |       |       |      |      |      |
|-----|----------------|---------------------------------|--------|---------|------|----|------|---|-----|-------|-------|-------|-------|-------|------|------|------|
| 168 | 5016051XG1751E | C/Fuenllana, 4                  | 614867 | 4171354 | 103  | 3  | 2005 | 1 | RC1 | 0.220 | 0.410 | 0.564 | 0.720 | 0.940 | 0.48 | 0.22 | 1.00 |
| 169 | 4700011XG1740B | C/Jerónimo de Santa Fe, 15      | 614568 | 4169802 | 104  | 3  | 1967 | 1 | RC1 | 0.360 | 0.550 | 0.704 | 0.860 | 1.080 | 0.93 | 0.45 | 1.74 |
| 170 | 6118401XG1761G | C/Pintor Luis Tornero, 5        | 616058 | 4171649 | 276  | 3  | 1969 | 1 | RC1 | 0.400 | 0.590 | 0.744 | 0.900 | 1.120 | 1.10 | 0.55 | 1.99 |
| 171 | 5704003XG1750D | C/Horno, 44                     | 615611 | 4170172 | 348  | 1  | 1996 | 1 | RC1 | 0.300 | 0.490 | 0.644 | 0.800 | 1.020 | 0.71 | 0.33 | 1.39 |
| 172 | 6117102XG1761E | Avda. de los Ángeles, 11, 13    | 616018 | 4171558 | 535  | 3  | 1970 | 1 | RC1 | 0.500 | 0.690 | 0.844 | 1.000 | 1.220 | 1.64 | 0.87 | 2.66 |
| 173 | 4710706XG1741B | C/Barandilla, 1                 | 614604 | 4170811 | 370  | 3  | 1978 | 1 | RC1 | 0.580 | 0.770 | 0.924 | 1.080 | 1.300 | 2.15 | 1.23 | 3.19 |
| 174 | 4804003XG1740D | C/Santa Paula, 4, 6             | 614702 | 4170199 | 860  | 4  | 1999 | 1 | RC1 | 0.160 | 0.350 | 0.504 | 0.660 | 0.880 | 0.36 | 0.16 | 0.76 |
| 175 | 4805209XG1740F | C/Colmenarico, 13               | 614713 | 4170365 | 183  | 2  | 1996 | 1 | RC1 | 0.180 | 0.370 | 0.524 | 0.680 | 0.900 | 0.39 | 0.18 | 0.83 |
| 176 | 5009804XG1750G | C/Lope Gisbert, 37              | 614911 | 4170769 | 284  | 4  | 2003 | 1 | RC1 | 0.180 | 0.370 | 0.524 | 0.680 | 0.900 | 0.39 | 0.18 | 0.83 |
| 177 | 5716009XG1751F | C/Ortega Melgares, 77           | 615624 | 4171398 | 554  | 4  | 2003 | 1 | RC1 | 0.180 | 0.370 | 0.524 | 0.680 | 0.900 | 0.39 | 0.18 | 0.83 |
| 178 | 6114302XG1761C | C/Dolores Blaya Cueto, 21       | 616054 | 4171288 | 610  | 4  | 1998 | 1 | RC1 | 0.220 | 0.410 | 0.564 | 0.720 | 0.940 | 0.48 | 0.22 | 1.00 |
| 179 | 5311020XG1751A | C/Eugenio Ubeda, 1              | 615073 | 4170851 | 457  | 3  | 1998 | 1 | RC1 | 0.200 | 0.390 | 0.544 | 0.700 | 0.920 | 0.44 | 0.20 | 0.91 |
| 180 | 5614701XG1751D | Avda. Europa, 25                | 615503 | 4171223 | 360  | 3  | 1971 | 1 | RC1 | 0.420 | 0.610 | 0.764 | 0.920 | 1.140 | 1.20 | 0.60 | 2.12 |
| 181 | 5514301XG1751D | C/Juan Antonio Filiberto, 3     | 615491 | 4171279 | 352  | 3  | 1971 | 1 | RC1 | 0.460 | 0.650 | 0.804 | 0.960 | 1.180 | 1.41 | 0.73 | 2.39 |
| 182 | 4496001XG1649E | C/Sagrada Familia, 1            | 614288 | 4169400 | 185  | 3  | 1960 | 1 | RC1 | 0.380 | 0.570 | 0.724 | 0.880 | 1.100 | 1.01 | 0.50 | 1.86 |
| 183 | 5604104XG1750D | C/Santa Quiteria, 31            | 615513 | 4170301 | 330  | 2  | 1971 | 1 | RC1 | 0.580 | 0.770 | 0.924 | 1.080 | 1.300 | 2.15 | 1.23 | 3.19 |
| 184 | 6117101XG1761E | Avda. de los Ángeles, 15, 17    | 616008 | 4171602 | 1056 | 3  | 1971 | 1 | RC1 | 0.500 | 0.690 | 0.844 | 1.000 | 1.220 | 1.64 | 0.87 | 2.66 |
| 185 | 4915701XG1741F | C/Eulogio Perriago, 29          | 614825 | 4171312 | 314  | 5  | 1978 | 1 | RC1 | 0.420 | 0.610 | 0.764 | 0.920 | 1.140 | 1.20 | 0.60 | 2.12 |
| 186 | 5515601XG1751F | C/Puente Gimeno, 5              | 615430 | 4171298 | 328  | 5  | 1970 | 1 | RC1 | 0.420 | 0.610 | 0.764 | 0.920 | 1.140 | 1.20 | 0.60 | 2.12 |
| 187 | 4907009XG1740F | C/Corredera, 26                 | 614745 | 4170509 | 155  | 3  | 2003 | 1 | RC1 | 0.180 | 0.370 | 0.524 | 0.680 | 0.900 | 0.39 | 0.18 | 0.83 |
| 188 | 6118901XG1761G | C/Pintor Luis Tornero, 3        | 616035 | 4171646 | 279  | 3  | 1969 | 1 | RC1 | 0.400 | 0.590 | 0.744 | 0.900 | 1.120 | 1.10 | 0.55 | 1.99 |
| 189 | 4702813XG1740B | C/Párroco Antonio Llamas, 5     | 614594 | 4170038 | 103  | 3  | 1975 | 1 | RC1 | 0.360 | 0.550 | 0.704 | 0.860 | 1.080 | 0.93 | 0.45 | 1.74 |
| 190 | 5395010XG1659E | Alameda de Cervantes, 75        | 615156 | 4169341 | 170  | 4  | 1989 | 1 | RC1 | 0.260 | 0.450 | 0.604 | 0.760 | 0.980 | 0.58 | 0.27 | 1.18 |
| 191 | 5097401XG1659E | C/Pintor Rebollo Zamora, 1      | 614961 | 4169551 | 531  | 10 | 1984 | 1 | RC1 | 0.240 | 0.430 | 0.584 | 0.740 | 0.960 | 0.53 | 0.24 | 1.09 |
| 192 | 4705001XG1740F | C/Narciso Yepes, 27             | 614495 | 4170333 | 572  | 3  | 2003 | 1 | RC1 | 0.380 | 0.570 | 0.724 | 0.880 | 1.100 | 1.01 | 0.50 | 1.86 |
| 193 | 4395802XG1649E | C/Guitarrista Cano, 16          | 614202 | 4169338 | 180  | 2  | 1956 | 1 | RC1 | 0.420 | 0.610 | 0.764 | 0.920 | 1.140 | 1.20 | 0.60 | 2.12 |
| 194 | 5914901XG1751D | Avda. Europa, 30, Bl. 6         | 615835 | 4171228 | 920  | 4  | 1990 | 1 | RC1 | 0.460 | 0.650 | 0.804 | 0.960 | 1.180 | 1.41 | 0.73 | 2.39 |
| 195 | 5715027XG1751F | C/Virgen de la Soledad, 6       | 615570 | 4171309 | 3659 | 4  | 1998 | 1 | RC1 | 0.200 | 0.390 | 0.544 | 0.700 | 0.920 | 0.44 | 0.20 | 0.91 |
| 196 | 4194803XG1649C | C/Guillermo Oliver, 3, 5        | 614016 | 4169218 | 475  | 3  | 1981 | 1 | RC1 | 0.400 | 0.590 | 0.744 | 0.900 | 1.120 | 1.10 | 0.55 | 1.99 |
| 197 | 5108013XG1750G | Avda. Juan Carlos I, 37         | 614990 | 4170554 | 341  | 7  | 1989 | 1 | RC1 | 0.320 | 0.510 | 0.664 | 0.820 | 1.040 | 0.78 | 0.37 | 1.50 |
| 198 | 5105001XG1750E | Avda. Juan Carlos I, 38         | 614937 | 4170398 | 1396 | 7  | 1975 | 1 | RC1 | 0.420 | 0.610 | 0.764 | 0.920 | 1.140 | 1.20 | 0.60 | 2.12 |
| 199 | 4600007XG1740B | C/Puerto Lumbreras, 3           | 614483 | 4169794 | 106  | 3  | 1973 | 1 | RC1 | 0.360 | 0.550 | 0.704 | 0.860 | 1.080 | 0.93 | 0.45 | 1.74 |
| 200 | 4809402XG1740H | C/Rubira, 23                    | 614790 | 4170754 | 217  | 3  | 1995 | 1 | RC1 | 0.180 | 0.370 | 0.524 | 0.680 | 0.900 | 0.39 | 0.18 | 0.83 |
| 201 | 5296901XG1659E | Alameda de Cervantes, 61        | 615112 | 4169443 | 426  | 4  | 2005 | 1 | RC1 | 0.140 | 0.330 | 0.484 | 0.640 | 0.860 | 0.32 | 0.15 | 0.69 |
| 202 | 5914601XG1751D | Avda. Europa, 30, Bl. 5         | 615869 | 4171239 | 646  | 4  | 1990 | 1 | RC1 | 0.260 | 0.450 | 0.604 | 0.760 | 0.980 | 0.58 | 0.27 | 1.18 |
| 203 | 5105004XG1750E | Avda. Periodista López Barne, 1 | 614942 | 4170261 | 1695 | 4  | 2005 | 1 | RC1 | 0.420 | 0.610 | 0.764 | 0.920 | 1.140 | 1.20 | 0.60 | 2.12 |
| 204 | 4293810XG1649C | C/Albañilería, 12               | 614072 | 4169135 | 263  | 3  | 1976 | 1 | RC1 | 0.440 | 0.630 | 0.784 | 0.940 | 1.160 | 1.30 | 0.66 | 2.26 |
| 205 | 4902001XG1740B | Alameda de Cervantes, 12        | 614780 | 4169986 | 1379 | 10 | 1973 | 1 | RC1 | 0.320 | 0.510 | 0.664 | 0.820 | 1.040 | 0.78 | 0.37 | 1.50 |
| 206 | 4697011XG1649F | C/Camino Viejo del Puerto, 1    | 614390 | 4169486 | 617  | 4  | 1973 | 1 | RC1 | 0.500 | 0.690 | 0.844 | 1.000 | 1.220 | 1.64 | 0.87 | 2.66 |
| 207 | 5006008XG1750E | C/Murillo, 11                   | 614841 | 4170363 | 301  | 3  | 1973 | 1 | RC1 | 0.440 | 0.630 | 0.784 | 0.940 | 1.160 | 1.30 | 0.66 | 2.26 |
| 208 | 4605002XG1740F | C/Rambllila de San Lázaro, 19   | 614461 | 4170298 | 203  | 2  | 1980 | 1 | RC1 | 0.200 | 0.390 | 0.544 | 0.700 | 0.920 | 0.44 | 0.20 | 0.91 |
| 209 | 5115610XG1751E | C/Alcalde Pelegrín Rodríguez, 8 | 615029 | 4171230 | 169  | 3  | 1973 | 1 | RC1 | 0.420 | 0.610 | 0.764 | 0.920 | 1.140 | 1.20 | 0.60 | 2.12 |
| 210 | 4295014XG1649E | C/Rambla de las Chatas, 6       | 614094 | 4169295 | 259  | 2  | 1999 | 1 | RC1 | 0.300 | 0.490 | 0.644 | 0.800 | 1.020 | 0.71 | 0.33 | 1.39 |
| 211 | 4705004XG1740F | C/Narciso Yepes, 21             | 614515 | 4170315 | 319  | 3  | 1979 | 1 | RC1 | 0.380 | 0.570 | 0.724 | 0.880 | 1.100 | 1.01 | 0.50 | 1.86 |
| 212 | 5212002XG1751A | C/Poeta Para Vico, 10           | 615151 | 4169560 | 428  | 2  | 1970 | 1 | RC1 | 0.380 | 0.570 | 0.724 | 0.880 | 1.100 | 1.01 | 0.50 | 1.86 |
| 213 | 5111024XG1751A | C/Santo Domingo, 8              | 614930 | 4170883 | 1380 | 4  | 1988 | 1 | RC1 | 0.280 | 0.470 | 0.624 | 0.780 | 1.000 | 0.64 | 0.30 | 1.28 |
| 214 | 6318010XG1761G | C/Transformador, 3              | 616198 | 4171566 | 247  | 3  | 1998 | 1 | RC1 | 0.140 | 0.330 | 0.484 | 0.640 | 0.860 | 0.32 | 0.15 | 0.69 |
| 215 | 4806001XG1740F | C/Obispo Albuquerque, 2         | 614689 | 4170391 | 356  | 2  | 2000 | 1 | RC1 | 0.280 | 0.470 | 0.624 | 0.780 | 1.000 | 0.64 | 0.30 | 1.28 |
| 216 | 5110003XG1751A | C/Eugenio Ubeda, 4              | 615042 | 4170814 | 700  | 3  | 1995 | 1 | RC1 | 0.180 | 0.370 | 0.524 | 0.680 | 0.900 | 0.39 | 0.18 | 0.83 |
| 217 | 5108002XG1750G | C/Floridablanca, 6              | 614935 | 4170660 | 294  | 4  | 1992 | 1 | RC1 | 0.220 | 0.410 | 0.564 | 0.720 | 0.940 | 0.48 | 0.22 | 1.00 |
| 218 | 6216237XG1761E | C/Dr. Fleming, 2                | 616150 | 4171474 | 364  | 3  | 2008 | 1 | RC1 | 0.180 | 0.370 | 0.524 | 0.680 | 0.900 | 0.39 | 0.18 | 0.83 |
| 219 | 5116016XG1751E | Plaza de la Estrella, 10        | 614997 | 4171327 | 124  | 4  | 1998 | 1 | RC1 | 0.220 | 0.410 | 0.564 | 0.720 | 0.940 | 0.48 | 0.22 | 1.00 |
| 220 | 4998501XG1649H | C/Eugenio Noel, 9               | 614879 | 4169634 | 139  | 2  | 2007 | 1 | RC1 | 0.260 | 0.450 | 0.604 | 0.760 | 0.980 | 0.58 | 0.27 | 1.18 |
| 221 | 4803004XG1740D | Avda. Portugal, 28              | 614691 | 4170085 | 146  | 4  | 1994 | 1 | RC1 | 0.240 | 0.430 | 0.584 | 0.740 | 0.960 | 0.53 | 0.24 | 1.09 |
| 222 | 4395302XG1649E | Ctra. Granada, 16               | 614273 | 4169377 | 216  | 2  | 1956 | 1 | RC1 | 0.420 | 0.610 | 0.764 | 0.920 | 1.140 | 1.20 | 0.60 | 2.12 |
| 223 | 5716025XG1751F | C/Ortega Melgares, 55           | 615595 | 4171394 | 465  | 4  | 2004 | 1 | RC1 | 0.240 | 0.430 | 0.584 | 0.740 | 0.960 | 0.53 | 0.24 | 1.09 |
| 224 | 4605016XG1740F | C/Placica Nueva, 19             | 614478 | 4170237 | 238  | 2  | 1970 | 1 | RC1 | 0.340 | 0.530 | 0.684 | 0.840 | 1.060 | 0.85 | 0.41 | 1.62 |

|     |                |                                  |        |         |      |   |      |   |     |       |       |       |       |       |      |      |      |
|-----|----------------|----------------------------------|--------|---------|------|---|------|---|-----|-------|-------|-------|-------|-------|------|------|------|
| 225 | 4903009XG1740D | Alameda de Cervantes, 3          | 614820 | 4170062 | 1017 | 8 | 1983 | 1 | RC1 | 0.200 | 0.390 | 0.544 | 0.700 | 0.920 | 0.44 | 0.20 | 0.91 |
| 226 | 4193602XG1649C | C/Albañilería, 5                 | 614049 | 4169116 | 554  | 3 | 1996 | 1 | RC1 | 0.260 | 0.450 | 0.604 | 0.760 | 0.980 | 0.58 | 0.27 | 1.18 |
| 227 | 4903015XG1740D | Avda. Juan Carlos I, 12          | 614822 | 4170229 | 91   | 7 | 2002 | 1 | RC1 | 0.140 | 0.330 | 0.484 | 0.640 | 0.860 | 0.32 | 0.15 | 0.69 |
| 228 | 5110004XG1751A | Travesía Eugenio Úbeda, 1, 2     | 615048 | 4170793 | 630  | 3 | 1995 | 1 | RC1 | 0.340 | 0.530 | 0.684 | 0.840 | 1.060 | 0.85 | 0.41 | 1.62 |
| 229 | 4903001XG1740D | Avda. Juan Carlos I, 18          | 614829 | 4170237 | 158  | 7 | 1993 | 1 | RC1 | 0.320 | 0.510 | 0.664 | 0.820 | 1.040 | 0.78 | 0.37 | 1.50 |
| 230 | 4807005XG1740F | C/Pío XII, 14                    | 614700 | 4170498 | 416  | 3 | 1979 | 1 | RC1 | 0.340 | 0.530 | 0.684 | 0.840 | 1.060 | 0.85 | 0.41 | 1.62 |
| 231 | 5112802XG1751A | C/Puente Alberca, 8              | 614978 | 4171074 | 855  | 3 | 2000 | 1 | RC1 | 0.220 | 0.410 | 0.564 | 0.720 | 0.940 | 0.48 | 0.22 | 1.00 |
| 232 | 5107014XG1750E | Avda. Juan Carlos I, 40          | 614953 | 4170439 | 505  | 7 | 1973 | 1 | RC1 | 0.400 | 0.590 | 0.744 | 0.900 | 1.120 | 1.10 | 0.55 | 1.99 |
| 233 | 5119201XG1751G | C/Prolongación Calle Abellaneda  | 615057 | 4171690 | 693  | 4 | 2007 | 1 | RC1 | 0.480 | 0.670 | 0.824 | 0.980 | 1.200 | 1.52 | 0.80 | 2.53 |
| 234 | 5311005XG1751A | Avda. Juan Carlos I, 73          | 615196 | 4170898 | 129  | 7 | 2010 | 1 | RC1 | 0.220 | 0.410 | 0.564 | 0.720 | 0.940 | 0.48 | 0.22 | 1.00 |
| 235 | 5196909XG1659E | Alameda de Cervantes, 60         | 615087 | 4169366 | 983  | 4 | 1992 | 1 | RC1 | 0.320 | 0.510 | 0.664 | 0.820 | 1.040 | 0.78 | 0.37 | 1.50 |
| 236 | 6014201XG1761C | C/Dolores Blaya Cueto, 2         | 615918 | 4171239 | 460  | 4 | 2001 | 1 | RC1 | 0.180 | 0.370 | 0.524 | 0.680 | 0.900 | 0.39 | 0.18 | 0.83 |
| 237 | 5196908XG1659E | Alameda de Cervantes 60, B2      | 615071 | 4169400 | 369  | 4 | 1992 | 1 | RC1 | 0.320 | 0.510 | 0.664 | 0.820 | 1.040 | 0.78 | 0.37 | 1.50 |
| 238 | 5214007XG1751C | C/Turbinto, 6, 8                 | 615095 | 4171237 | 1208 | 3 | 2002 | 1 | RC1 | 0.480 | 0.670 | 0.824 | 0.980 | 1.200 | 1.52 | 0.80 | 2.53 |
| 239 | 5004805XG1750C | Avda. Periodista López Barnés, 1 | 614922 | 4170230 | 640  | 4 | 2002 | 1 | RC1 | 0.220 | 0.410 | 0.564 | 0.720 | 0.940 | 0.48 | 0.22 | 1.00 |
| 240 | 4905010XG1740F | C/Serrallo, 7                    | 614790 | 4170229 | 191  | 4 | 1970 | 1 | RC1 | 0.320 | 0.510 | 0.664 | 0.820 | 1.040 | 0.78 | 0.37 | 1.50 |
| 241 | 4604220XG1740D | C/Bordadora Ángela Morales, 10   | 614551 | 4170255 | 111  | 4 | 1965 | 1 | RC1 | 0.380 | 0.570 | 0.724 | 0.880 | 1.100 | 1.01 | 0.50 | 1.86 |
| 242 | 4703006XG1740D | Avda. Portugal, 14               | 614641 | 4170148 | 438  | 4 | 1974 | 1 | RC1 | 0.380 | 0.570 | 0.724 | 0.880 | 1.100 | 1.01 | 0.50 | 1.86 |
| 243 | 4495040XG1649E | Ctra. Granada, 19                | 614322 | 4169387 | 155  | 3 | 1992 | 1 | RC1 | 0.260 | 0.450 | 0.604 | 0.760 | 0.980 | 0.58 | 0.27 | 1.18 |
| 244 | 4912505XG1741B | C/Gigante, 2                     | 614857 | 4171001 | 219  | 2 | 1910 | 1 | RC1 | 0.600 | 0.790 | 0.944 | 1.100 | 1.320 | 2.28 | 1.33 | 3.31 |
| 245 | 4903013XG1740D | Avda. Juan Carlos I, 8           | 614823 | 4170188 | 2821 | 7 | 1981 | 1 | RC1 | 0.280 | 0.470 | 0.624 | 0.780 | 1.000 | 0.64 | 0.30 | 1.28 |
| 246 | 4601014XG1740B | C/Pérez Casas, 45                | 614475 | 4169847 | 405  | 4 | 1974 | 1 | RC1 | 0.300 | 0.490 | 0.644 | 0.800 | 1.020 | 0.71 | 0.33 | 1.39 |
| 247 | 5314003XG1751C | Avda. Rafael Maroto, 9           | 615307 | 4171167 | 200  | 4 | 1970 | 1 | RC1 | 0.420 | 0.610 | 0.764 | 0.920 | 1.140 | 1.20 | 0.60 | 2.12 |
| 248 | 5802021XG1750B | Alameda Virgen de las Huertas, 6 | 615739 | 4169975 | 258  | 1 | 2008 | 1 | RC1 | 0.220 | 0.410 | 0.564 | 0.720 | 0.940 | 0.48 | 0.22 | 1.00 |
| 249 | 4189006XG1648G | C/Francisco Pizarro, 6           | 613933 | 4168670 | 211  | 1 | 2011 | 1 | RC1 | 0.180 | 0.370 | 0.524 | 0.680 | 0.900 | 0.39 | 0.18 | 0.83 |
| 250 | 5212020XG1751A | Travesía Carril de Caldereros, 6 | 615096 | 4170931 | 100  | 2 | 1961 | 1 | RC1 | 0.420 | 0.610 | 0.764 | 0.920 | 1.140 | 1.20 | 0.60 | 2.12 |
| 251 | 4598240XG1649H | C/Pérez Casas, 105               | 614411 | 4169635 | 229  | 4 | 1985 | 1 | RC1 | 0.240 | 0.430 | 0.584 | 0.740 | 0.960 | 0.53 | 0.24 | 1.09 |
| 252 | 4393102XG1649C | C/Ramblas de las Chatas, 68      | 614260 | 4169140 | 363  | 2 | 1996 | 1 | RC1 | 0.300 | 0.490 | 0.644 | 0.800 | 1.020 | 0.71 | 0.33 | 1.39 |
| 253 | 4600020XG1740B | C/Pérez Casas, 69                | 614456 | 4169767 | 153  | 3 | 1981 | 1 | RC1 | 0.260 | 0.450 | 0.604 | 0.760 | 0.980 | 0.58 | 0.27 | 1.18 |
| 254 | 5311013XG1751A | Avda. Juan Carlos I, 57          | 615436 | 4170807 | 281  | 3 | 1966 | 1 | RC1 | 0.300 | 0.490 | 0.644 | 0.800 | 1.020 | 0.71 | 0.33 | 1.39 |
| 255 | 4604610XG1740D | C/Nogalte, 40                    | 614542 | 4170171 | 378  | 4 | 2000 | 1 | RC1 | 0.260 | 0.450 | 0.604 | 0.760 | 0.980 | 0.58 | 0.27 | 1.18 |
| 256 | 5000301XG1750A | C/Doctor Gimeno Baduell, 4       | 614960 | 4169865 | 927  | 5 | 1980 | 1 | RC1 | 0.360 | 0.550 | 0.704 | 0.860 | 1.080 | 0.93 | 0.45 | 1.74 |
| 257 | 4697001XG1649F | C/Jerónimo de Santa Fe, 41       | 614466 | 4169615 | 512  | 4 | 1989 | 1 | RC1 | 0.520 | 0.710 | 0.864 | 1.020 | 1.240 | 1.76 | 0.95 | 2.80 |
| 258 | 4604607XG1740D | C/Nogalte, 36                    | 614560 | 4170198 | 317  | 4 | 1984 | 1 | RC1 | 0.360 | 0.550 | 0.704 | 0.860 | 1.080 | 0.93 | 0.45 | 1.74 |
| 259 | 4495017XG1649E | C/Camino Viejo del Puerto, 54    | 614286 | 4169223 | 357  | 4 | 1990 | 1 | RC1 | 0.240 | 0.430 | 0.584 | 0.740 | 0.960 | 0.53 | 0.24 | 1.09 |
| 260 | 4395005XG1649E | Ctra. Granada, 6                 | 614186 | 4169267 | 796  | 3 | 1999 | 1 | RC1 | 0.260 | 0.450 | 0.604 | 0.760 | 0.980 | 0.58 | 0.27 | 1.18 |
| 261 | 5004810XG1750C | Alameda de Menchirón, 1          | 614862 | 4170233 | 703  | 6 | 1974 | 1 | RC1 | 0.420 | 0.610 | 0.764 | 0.920 | 1.140 | 1.20 | 0.60 | 2.12 |
| 262 | 4499208XG1649G | C/Marqués de los Vélez, 12       | 614345 | 4169769 | 181  | 3 | 2008 | 1 | RC1 | 0.520 | 0.710 | 0.864 | 1.020 | 1.240 | 1.76 | 0.95 | 2.80 |
| 263 | 4295001XG1649E | C/Río Guadalentín, 19            | 614065 | 4169355 | 713  | 1 | 1990 | 1 | RC1 | 0.360 | 0.550 | 0.704 | 0.860 | 1.080 | 0.93 | 0.45 | 1.74 |
| 264 | 4803010XG1740D | C/Hernando de Burgos, 3          | 614665 | 4170062 | 937  | 3 | 1997 | 1 | RC1 | 0.260 | 0.450 | 0.604 | 0.760 | 0.980 | 0.58 | 0.27 | 1.18 |
| 265 | 4293805XG1649C | C/Carpintería, 1                 | 614121 | 4169135 | 164  | 4 | 1969 | 1 | RC1 | 0.500 | 0.690 | 0.844 | 1.000 | 1.220 | 1.64 | 0.87 | 2.66 |
| 266 | 5006003XG1750E | Avda. Juan Carlos I, 27          | 614885 | 4170391 | 585  | 7 | 1970 | 1 | RC1 | 0.320 | 0.510 | 0.664 | 0.820 | 1.040 | 0.78 | 0.37 | 1.50 |
| 267 | 5105009XG1750E | Avda. Juan Carlos I, 32          | 614915 | 4170356 | 710  | 7 | 1981 | 1 | RC1 | 0.240 | 0.430 | 0.584 | 0.740 | 0.960 | 0.53 | 0.24 | 1.09 |
| 268 | 4701007XG1740B | C/Jerónimo de Santa Fe, 28       | 614572 | 4169876 | 674  | 4 | 1975 | 1 | RC1 | 0.320 | 0.510 | 0.664 | 0.820 | 1.040 | 0.78 | 0.37 | 1.50 |
| 269 | 4706709XG1740F | C/Alfonso X el Sabio, 22         | 614613 | 4170411 | 116  | 4 | 1970 | 1 | RC1 | 0.460 | 0.650 | 0.804 | 0.960 | 1.180 | 1.41 | 0.73 | 2.39 |
| 270 | 5111026XG1751A | C/Santo Domingo, 12              | 614917 | 4170910 | 188  | 3 | 1975 | 1 | RC1 | 0.360 | 0.550 | 0.704 | 0.860 | 1.080 | 0.93 | 0.45 | 1.74 |
| 271 | 4291615XG1649A | C/Infante Juan Manuel, 10        | 614167 | 4168935 | 314  | 2 | 1993 | 1 | RC1 | 0.280 | 0.470 | 0.624 | 0.780 | 1.000 | 0.64 | 0.30 | 1.28 |
| 272 | 5311023XG1751A | C/Carril de Caldereros, 30       | 615080 | 4170880 | 122  | 3 | 1980 | 1 | RC1 | 0.360 | 0.550 | 0.704 | 0.860 | 1.080 | 0.93 | 0.45 | 1.74 |
| 273 | 5107015XG1750E | Avda. Juan Carlos I, 42          | 614963 | 4170454 | 347  | 7 | 1987 | 1 | RC1 | 0.240 | 0.430 | 0.584 | 0.740 | 0.960 | 0.53 | 0.24 | 1.09 |
| 274 | 4905004XG1740F | Avda. Juan Carlos I, 19          | 614795 | 4170282 | 1075 | 8 | 1975 | 1 | RC1 | 0.320 | 0.510 | 0.664 | 0.820 | 1.040 | 0.78 | 0.37 | 1.50 |
| 275 | 5097219XG1659E | C/Escultor Lorenzo Villanueva, 8 | 614890 | 4169600 | 411  | 2 | 2005 | 1 | RC1 | 0.320 | 0.510 | 0.664 | 0.820 | 1.040 | 0.78 | 0.37 | 1.50 |
| 276 | 4191103XG1649A | C/Curtidores, 12                 | 614027 | 4168975 | 353  | 4 | 1974 | 1 | RC1 | 0.320 | 0.510 | 0.664 | 0.820 | 1.040 | 0.78 | 0.37 | 1.50 |
| 277 | 4906905XG1740F | Plaza Calderón de la Barca, 1    | 614800 | 4170434 | 371  | 5 | 1982 | 1 | RC1 | 0.240 | 0.430 | 0.584 | 0.740 | 0.960 | 0.53 | 0.24 | 1.09 |
| 278 | 4498203XG1649G | C/Isabel Carrillo, 4             | 614336 | 4169672 | 1071 | 5 | 2007 | 1 | RC1 | 0.380 | 0.570 | 0.724 | 0.880 | 1.100 | 1.01 | 0.50 | 1.86 |
| 279 | 5311008XG1751A | Avda. Juan Carlos I, 81          | 615170 | 4170866 | 557  | 7 | 1980 | 1 | RC1 | 0.180 | 0.370 | 0.524 | 0.680 | 0.900 | 0.39 | 0.18 | 0.83 |
| 280 | 4293808XG1649C | C/Albañilería, 4                 | 614103 | 4169117 | 226  | 4 | 2005 | 1 | RC1 | 0.180 | 0.370 | 0.524 | 0.680 | 0.900 | 0.39 | 0.18 | 0.83 |
| 281 | 5107007XG1750E | Alameda Ramón y Cajal, 12        | 615048 | 4170472 | 985  | 3 | 1987 | 1 | RC1 | 0.360 | 0.550 | 0.704 | 0.860 | 1.080 | 0.93 | 0.45 | 1.74 |

|     |                |                                  |        |         |      |    |      |   |     |       |       |       |       |       |      |      |      |
|-----|----------------|----------------------------------|--------|---------|------|----|------|---|-----|-------|-------|-------|-------|-------|------|------|------|
| 282 | 5000802XG1750A | Alameda de Cervantes, 13         | 614920 | 4169837 | 828  | 5  | 1975 | 1 | RC1 | 0.400 | 0.590 | 0.744 | 0.900 | 1.120 | 1.10 | 0.55 | 1.99 |
| 283 | 4294801XG1649C | Avda. de la Salud, 12            | 614074 | 4169262 | 745  | 4  | 1984 | 1 | RC1 | 0.340 | 0.530 | 0.684 | 0.840 | 1.060 | 0.85 | 0.41 | 1.62 |
| 284 | 4804615XG1740D | C/Santa Paula, 11                | 614732 | 4170191 | 573  | 4  | 1990 | 1 | RC1 | 0.200 | 0.390 | 0.544 | 0.700 | 0.920 | 0.44 | 0.20 | 0.91 |
| 285 | 4804614XG1740D | C/Santa Paula, 3                 | 614705 | 4170238 | 145  | 4  | 1996 | 1 | RC1 | 0.140 | 0.330 | 0.484 | 0.640 | 0.860 | 0.32 | 0.15 | 0.69 |
| 286 | 4700012XG1740B | C/Jerónimo de Santa Fe, 13       | 614570 | 4169810 | 148  | 3  | 1965 | 1 | RC1 | 0.340 | 0.530 | 0.684 | 0.840 | 1.060 | 0.85 | 0.41 | 1.62 |
| 287 | 5615235XG1751F | C/Ortega Melgares, 58            | 615583 | 4171370 | 333  | 4  | 2010 | 1 | RC1 | 0.180 | 0.370 | 0.524 | 0.680 | 0.900 | 0.39 | 0.18 | 0.83 |
| 288 | 4193604XG1649C | C/Herrería, 8, 10                | 614025 | 4169074 | 527  | 3  | 1976 | 1 | RC1 | 0.340 | 0.530 | 0.684 | 0.840 | 1.060 | 0.85 | 0.41 | 1.62 |
| 289 | 4806201XG1740F | C/Corredera, 24                  | 614735 | 4170480 | 371  | 2  | 2004 | 1 | RC1 | 0.540 | 0.730 | 0.884 | 1.040 | 1.260 | 1.89 | 1.04 | 2.93 |
| 290 | 5415809XG1751E | C/Ortega Melgares-Caballón, 15   | 615287 | 4171346 | 103  | 2  | 1970 | 1 | RC1 | 0.380 | 0.570 | 0.724 | 0.880 | 1.100 | 1.01 | 0.50 | 1.86 |
| 291 | 4604221XG1740D | C/Bordadora Ángela Morales, 12   | 614542 | 4170257 | 111  | 2  | 1965 | 1 | RC1 | 0.300 | 0.490 | 0.644 | 0.800 | 1.020 | 0.71 | 0.33 | 1.39 |
| 292 | 3993201XG1639D | C/Alfarería, 8                   | 613851 | 4169164 | 770  | 1  | 1998 | 1 | RC1 | 0.220 | 0.410 | 0.564 | 0.720 | 0.940 | 0.48 | 0.22 | 1.00 |
| 293 | 5006009XG1750E | C/Murillo, 9                     | 614846 | 4170377 | 141  | 4  | 1960 | 1 | RC1 | 0.260 | 0.450 | 0.604 | 0.760 | 0.980 | 0.58 | 0.27 | 1.18 |
| 294 | 5814012XG1751D | Avda. Europa, 4                  | 615550 | 4171184 | 266  | 4  | 1990 | 1 | RC1 | 0.520 | 0.710 | 0.864 | 1.020 | 1.240 | 1.76 | 0.95 | 2.80 |
| 295 | 5099601XG1659G | Alameda de los Tristes, 19       | 614983 | 4169754 | 953  | 4  | 1995 | 1 | RC1 | 0.260 | 0.450 | 0.604 | 0.760 | 0.980 | 0.58 | 0.27 | 1.18 |
| 296 | 4905002XG1740F | C/Poeta Carlos Mellado, 4        | 614807 | 4170293 | 299  | 4  | 1970 | 1 | RC1 | 0.320 | 0.510 | 0.664 | 0.820 | 1.040 | 0.78 | 0.37 | 1.50 |
| 297 | 6015408XG1761E | Avda. Fuerzas Armadas, 8         | 615947 | 4171381 | 355  | 4  | 2001 | 1 | RC1 | 0.220 | 0.410 | 0.564 | 0.720 | 0.940 | 0.48 | 0.22 | 1.00 |
| 298 | 4395604XG1649E | Ctra. Granada, 26                | 614224 | 4169295 | 218  | 2  | 1956 | 1 | RC1 | 0.420 | 0.610 | 0.764 | 0.920 | 1.140 | 1.20 | 0.60 | 2.12 |
| 299 | 4495015XG1649E | C/Camino Viejo del Puerto, 50    | 614289 | 4169245 | 169  | 4  | 1990 | 1 | RC1 | 0.240 | 0.430 | 0.584 | 0.740 | 0.960 | 0.53 | 0.24 | 1.09 |
| 300 | 4495808XG1649E | C/Joaquín Sorolla, 9             | 614360 | 4169338 | 922  | 3  | 2008 | 1 | RC1 | 0.280 | 0.470 | 0.624 | 0.780 | 1.000 | 0.64 | 0.30 | 1.28 |
| 301 | 4698106XG1649H | C/Predicador Juan Antonio Malo   | 614494 | 4169632 | 563  | 4  | 1988 | 1 | RC1 | 0.220 | 0.410 | 0.564 | 0.720 | 0.940 | 0.48 | 0.22 | 1.00 |
| 302 | 4698105XG1649H | C/Martín Morata, 12              | 614537 | 4169621 | 1268 | 4  | 1981 | 1 | RC1 | 0.540 | 0.730 | 0.884 | 1.040 | 1.260 | 1.89 | 1.04 | 2.93 |
| 303 | 5804701XG1750D | C/Santa Quiteria, 101            | 615731 | 4170233 | 190  | 1  | 2001 | 1 | RC1 | 0.280 | 0.470 | 0.624 | 0.780 | 1.000 | 0.64 | 0.30 | 1.28 |
| 304 | 4498048XG1649G | C/Pérez Casas, 110               | 614340 | 4169549 | 1165 | 4  | 1978 | 1 | RC1 | 0.300 | 0.490 | 0.644 | 0.800 | 1.020 | 0.71 | 0.33 | 1.39 |
| 305 | 4903008XG1740D | Alameda de Cervantes, 7          | 614834 | 4170030 | 1654 | 11 | 1983 | 1 | RC1 | 0.320 | 0.510 | 0.664 | 0.820 | 1.040 | 0.78 | 0.37 | 1.50 |
| 306 | 4602905XG1740B | C/Pérez Casas, 7                 | 614532 | 4170027 | 196  | 4  | 1968 | 1 | RC1 | 0.320 | 0.510 | 0.664 | 0.820 | 1.040 | 0.78 | 0.37 | 1.50 |
| 307 | 4905904XG1740F | Avda. Juan Carlos I, 25          | 614838 | 4170308 | 391  | 7  | 1981 | 1 | RC1 | 0.220 | 0.410 | 0.564 | 0.720 | 0.940 | 0.48 | 0.22 | 1.00 |
| 308 | 4698103XG1649H | C/Martín Morata, 6               | 614542 | 4169682 | 471  | 4  | 2004 | 1 | RC1 | 0.160 | 0.350 | 0.504 | 0.660 | 0.880 | 0.36 | 0.16 | 0.76 |
| 309 | 4702501XG1740B | Travesía Jerónimo de Santa Fe, 1 | 614662 | 4170016 | 328  | 7  | 1964 | 1 | RC1 | 0.340 | 0.530 | 0.684 | 0.840 | 1.060 | 0.85 | 0.41 | 1.62 |
| 310 | 4605018XG1740F | C/Alonso Vargas, 4               | 614442 | 4170237 | 725  | 1  | 1970 | 1 | RC1 | 0.240 | 0.430 | 0.584 | 0.740 | 0.960 | 0.53 | 0.24 | 1.09 |
| 311 | 4807024XG1740F | C/Alfonso X el Sabio, 1          | 614618 | 4170486 | 578  | 3  | 2001 | 1 | RC1 | 0.180 | 0.370 | 0.524 | 0.680 | 0.900 | 0.39 | 0.18 | 0.83 |
| 312 | 5108012XG1750G | Avda. Juan Carlos I, 55          | 614990 | 4170591 | 1226 | 7  | 1992 | 1 | RC1 | 0.240 | 0.430 | 0.584 | 0.740 | 0.960 | 0.53 | 0.24 | 1.09 |
| 313 | 4804007XG1740D | Plaza Óvalo de Santa Paula, 2    | 614710 | 4170124 | 2434 | 9  | 1988 | 1 | RC1 | 0.520 | 0.710 | 0.864 | 1.020 | 1.240 | 1.76 | 0.95 | 2.80 |
| 314 | 4805202XG1740F | C/Alporchones, 8                 | 614759 | 4170420 | 333  | 4  | 1989 | 1 | RC1 | 0.300 | 0.490 | 0.644 | 0.800 | 1.020 | 0.71 | 0.33 | 1.39 |
| 315 | 4291004XG1649A | Ctra. Granada, 77                | 614045 | 4168914 | 387  | 1  | 1970 | 1 | RC1 | 0.300 | 0.490 | 0.644 | 0.800 | 1.020 | 0.71 | 0.33 | 1.39 |
| 316 | 4805203XG1740F | Plaza Calderón de la Barca, 5    | 614748 | 4170404 | 646  | 4  | 1995 | 1 | RC1 | 0.220 | 0.410 | 0.564 | 0.720 | 0.940 | 0.48 | 0.22 | 1.00 |
| 317 | 4804010XG1740D | C/Abenhalaj, 11                  | 614681 | 4170171 | 246  | 4  | 1997 | 1 | RC1 | 0.140 | 0.330 | 0.484 | 0.640 | 0.860 | 0.32 | 0.15 | 0.69 |
| 318 | 4805204XG1740F | C/Príncipe Alfonso, 4            | 614737 | 4170396 | 830  | 4  | 1984 | 1 | RC1 | 0.320 | 0.510 | 0.664 | 0.820 | 1.040 | 0.78 | 0.37 | 1.50 |
| 319 | 4291008XG1649A | Ctra. Granada, 71                | 614100 | 4168958 | 4454 | 4  | 2001 | 1 | RC1 | 0.580 | 0.770 | 0.924 | 1.080 | 1.300 | 2.15 | 1.23 | 3.19 |
| 320 | 4191102XG1649A | C/Curtidores, 5                  | 614037 | 4168993 | 515  | 4  | 1981 | 1 | RC1 | 0.300 | 0.490 | 0.644 | 0.800 | 1.020 | 0.71 | 0.33 | 1.39 |
| 321 | 4706036XG1740F | C/Espín Alta, 36                 | 614500 | 4170368 | 196  | 4  | 1979 | 1 | RC1 | 0.440 | 0.630 | 0.784 | 0.940 | 1.160 | 1.30 | 0.66 | 2.26 |
| 324 | 4598254XG1649H | C/Pérez Casas, 115               | 614403 | 4169606 | 311  | 4  | 2007 | 1 | RC1 | 0.160 | 0.350 | 0.504 | 0.660 | 0.880 | 0.36 | 0.16 | 0.76 |
| 325 | 4695010XG1649F | Travesía Camino Viejo del Puerto | 614355 | 4169232 | 208  | 3  | 1978 | 1 | RC1 | 0.340 | 0.530 | 0.684 | 0.840 | 1.060 | 0.85 | 0.41 | 1.62 |
| 326 | 6015404XG1761E | C/Paseo de Guerra, 13            | 615965 | 4171321 | 624  | 4  | 1990 | 1 | RC1 | 0.380 | 0.570 | 0.724 | 0.880 | 1.100 | 1.01 | 0.50 | 1.86 |
| 327 | 5814011XG1751D | C/Canal de San Diego, 1, 3       | 615631 | 4171180 | 454  | 4  | 1993 | 1 | RC1 | 0.240 | 0.430 | 0.584 | 0.740 | 0.960 | 0.53 | 0.24 | 1.09 |
| 328 | 5314915XG1751C | C/Ingeniero Agustín de Betancou  | 615133 | 4171276 | 477  | 3  | 2002 | 1 | RC1 | 0.300 | 0.490 | 0.644 | 0.800 | 1.020 | 0.71 | 0.33 | 1.39 |
| 329 | 5296904XG1659E | Alameda de Cervantes, 63         | 615121 | 4169428 | 419  | 4  | 2002 | 1 | RC1 | 0.240 | 0.430 | 0.584 | 0.740 | 0.960 | 0.53 | 0.24 | 1.09 |
| 330 | 4908003XG1740H | C/Álamo, 24                      | 614777 | 4170607 | 358  | 4  | 1986 | 1 | RC1 | 0.260 | 0.450 | 0.604 | 0.760 | 0.980 | 0.58 | 0.27 | 1.18 |
| 331 | 6417002XG1761E | C/Fuente del Oro, 1              | 616300 | 4171476 | 225  | 4  | 2000 | 1 | RC1 | 0.300 | 0.490 | 0.644 | 0.800 | 1.020 | 0.71 | 0.33 | 1.39 |
| 332 | 4697021XG1649F | C/La Seda, 6, 8                  | 614409 | 4169467 | 583  | 4  | 1991 | 1 | RC1 | 0.220 | 0.410 | 0.564 | 0.720 | 0.940 | 0.48 | 0.22 | 1.00 |
| 333 | 5311014XG1751A | Avda. Juan Carlos I, 69          | 615128 | 4170794 | 301  | 7  | 1971 | 1 | RC1 | 0.320 | 0.510 | 0.664 | 0.820 | 1.040 | 0.78 | 0.37 | 1.50 |
| 334 | 6114901XG1761C | C/Dolores Blaya Cueto, 8, 10     | 616031 | 4171252 | 1105 | 4  | 2003 | 1 | RC1 | 0.380 | 0.570 | 0.724 | 0.880 | 1.100 | 1.01 | 0.50 | 1.86 |
| 335 | 4393005XG1649C | Ctra. Granada, 65                | 614150 | 4169034 | 2830 | 4  | 1995 | 1 | RC1 | 0.480 | 0.670 | 0.824 | 0.980 | 1.200 | 1.52 | 0.80 | 2.53 |
| 336 | 4604901XG1740D | C/Bordadora Ángela Morales, 11   | 614520 | 4170240 | 131  | 4  | 1973 | 1 | RC1 | 0.460 | 0.650 | 0.804 | 0.960 | 1.180 | 1.41 | 0.73 | 2.39 |
| 337 | 5414701XG1751C | C/Huércal Overa, 6               | 615320 | 4171206 | 139  | 4  | 1962 | 1 | RC1 | 0.400 | 0.590 | 0.744 | 0.900 | 1.120 | 1.10 | 0.55 | 1.99 |
| 338 | 4697008XG1649F | C/Camino Viejo del Puerto, 7     | 614377 | 4169446 | 229  | 4  | 1989 | 1 | RC1 | 0.240 | 0.430 | 0.584 | 0.740 | 0.960 | 0.53 | 0.24 | 1.09 |
| 339 | 4799026XG1649H | C/Martín Morata, 17, 19          | 614590 | 4169681 | 1344 | 4  | 1991 | 1 | RC1 | 0.260 | 0.450 | 0.604 | 0.760 | 0.980 | 0.58 | 0.27 | 1.18 |
| 340 | 6015405XG1761E | C/Paseo de Guerra, 7             | 615961 | 4171345 | 309  | 4  | 2002 | 1 | RC1 | 0.180 | 0.370 | 0.524 | 0.680 | 0.900 | 0.39 | 0.18 | 0.83 |



|     |                |                                   |        |         |      |    |      |   |     |       |       |       |       |       |      |      |      |
|-----|----------------|-----------------------------------|--------|---------|------|----|------|---|-----|-------|-------|-------|-------|-------|------|------|------|
| 341 | 5615233XG1751F | C/Ortega Melgares, 30             | 615510 | 4171360 | 433  | 4  | 2011 | 1 | RC1 | 0.140 | 0.330 | 0.484 | 0.640 | 0.860 | 0.32 | 0.15 | 0.69 |
| 342 | 5014402XG1751C | C/Puente de los Carros, 3         | 614980 | 4171239 | 258  | 4  | 1971 | 1 | RC1 | 0.380 | 0.570 | 0.724 | 0.880 | 1.100 | 1.01 | 0.50 | 1.86 |
| 343 | 6098008XG1669G | C/Puente de la Pía, 7             | 615863 | 4169606 | 502  | 1  | 1985 | 1 | RC1 | 0.540 | 0.730 | 0.884 | 1.040 | 1.260 | 1.89 | 1.04 | 2.93 |
| 344 | 6216235XG1761E | Avda. de las Fuerzas Armadas, 35  | 616180 | 4171470 | 751  | 4  | 2005 | 1 | RC1 | 0.220 | 0.410 | 0.564 | 0.720 | 0.940 | 0.48 | 0.22 | 1.00 |
| 345 | 6217005XG1761E | C/Lope de Vega, 6                 | 616077 | 4171500 | 212  | 2  | 1967 | 1 | RC1 | 0.440 | 0.630 | 0.784 | 0.940 | 1.160 | 1.30 | 0.66 | 2.26 |
| 346 | 5110027XG1751A | C/Carril de Caldereros, 2         | 614992 | 4170774 | 1522 | 3  | 1992 | 1 | RC1 | 0.560 | 0.750 | 0.904 | 1.060 | 1.280 | 2.02 | 1.13 | 3.06 |
| 347 | 4804613XG1740D | C/Santa Paula, 7                  | 614721 | 4170213 | 295  | 4  | 1995 | 1 | RC1 | 0.220 | 0.410 | 0.564 | 0.720 | 0.940 | 0.48 | 0.22 | 1.00 |
| 348 | 5116029XG1751E | Plaza de Abastos, 4               | 614995 | 4171354 | 757  | 2  | 2010 | 1 | RC1 | 0.220 | 0.410 | 0.564 | 0.720 | 0.940 | 0.48 | 0.22 | 1.00 |
| 349 | 4704609XG1740D | C/Abenhalaj, 18                   | 614655 | 4170164 | 92   | 4  | 1989 | 1 | RC1 | 0.320 | 0.510 | 0.664 | 0.820 | 1.040 | 0.78 | 0.37 | 1.50 |
| 350 | 4703028XG1740D | C/Nogalte, 29                     | 614566 | 4170113 | 746  | 5  | 2009 | 1 | RC1 | 0.440 | 0.630 | 0.784 | 0.940 | 1.160 | 1.30 | 0.66 | 2.26 |
| 351 | 6118502XG1761G | C/Fotógrafo José Rodrigo, 3, 5, 7 | 616086 | 4171612 | 1116 | 3  | 1976 | 1 | RC1 | 0.440 | 0.630 | 0.784 | 0.940 | 1.160 | 1.30 | 0.66 | 2.26 |
| 352 | 4698101XG1649H | C/Martín Morata, 2                | 614533 | 4169739 | 352  | 4  | 1983 | 1 | RC1 | 0.320 | 0.510 | 0.664 | 0.820 | 1.040 | 0.78 | 0.37 | 1.50 |
| 353 | 5006005XG1750E | C/Reboloso, 9                     | 614868 | 4170354 | 345  | 7  | 1993 | 1 | RC1 | 0.320 | 0.510 | 0.664 | 0.820 | 1.040 | 0.78 | 0.37 | 1.50 |
| 354 | 6119701XG1761G | C/Escritor Alfonso Espejo, 2      | 616026 | 4171693 | 398  | 3  | 1972 | 1 | RC1 | 0.400 | 0.590 | 0.744 | 0.900 | 1.120 | 1.10 | 0.55 | 1.99 |
| 355 | 4293004XG1649C | C/Herrería, 3                     | 614060 | 4169080 | 515  | 3  | 1996 | 1 | RC1 | 0.180 | 0.370 | 0.524 | 0.680 | 0.900 | 0.39 | 0.18 | 0.83 |
| 356 | 6118505XG1761G | C/Pintor Luis Tornero, 2          | 616039 | 4171626 | 552  | 3  | 1972 | 1 | RC1 | 0.420 | 0.610 | 0.764 | 0.920 | 1.140 | 1.20 | 0.60 | 2.12 |
| 357 | 5309016XG1750G | C/Saint Fons, 1                   | 615222 | 4170767 | 705  | 4  | 1991 | 1 | RC1 | 0.220 | 0.410 | 0.564 | 0.720 | 0.940 | 0.48 | 0.22 | 1.00 |
| 358 | 4498003XG1649G | C/Rambla Alta, 49                 | 614244 | 4169791 | 671  | 3  | 1979 | 1 | RC1 | 0.480 | 0.670 | 0.824 | 0.980 | 1.200 | 1.52 | 0.80 | 2.53 |
| 359 | 6015001XG1761E | Avda. Fuerzas Armadas, 2          | 615866 | 4171369 | 832  | 4  | 1970 | 1 | RC1 | 0.340 | 0.530 | 0.684 | 0.840 | 1.060 | 0.85 | 0.41 | 1.62 |
| 360 | 4395602XG1649E | Ctra. Granada, 22                 | 614241 | 4169324 | 218  | 2  | 1956 | 1 | RC1 | 0.420 | 0.610 | 0.764 | 0.920 | 1.140 | 1.20 | 0.60 | 2.12 |
| 361 | 5198801XG1659G | Alameda de Cervantes, 57          | 615034 | 4169630 | 3173 | 4  | 2001 | 1 | RC1 | 0.320 | 0.510 | 0.664 | 0.820 | 1.040 | 0.78 | 0.37 | 1.50 |
| 362 | 4804017XG1740D | Plaza del Negrito, 2              | 614668 | 4170239 | 215  | 6  | 1976 | 1 | RC1 | 0.480 | 0.670 | 0.824 | 0.980 | 1.200 | 1.52 | 0.80 | 2.53 |
| 363 | 5105005XG1750E | Avda. Juan Carlos I, 22           | 614895 | 4170289 | 2701 | 11 | 1976 | 1 | RC1 | 0.360 | 0.550 | 0.704 | 0.860 | 1.080 | 0.93 | 0.45 | 1.74 |
| 364 | 5415815XG1751E | C/Ortega Melgares, 25, 29         | 615311 | 4171356 | 695  | 4  | 2009 | 1 | RC1 | 0.260 | 0.450 | 0.604 | 0.760 | 0.980 | 0.58 | 0.27 | 1.18 |
| 365 | 4804016XG1740D | C/Abenhalaj, 11                   | 614674 | 4170221 | 227  | 4  | 1989 | 1 | RC1 | 0.220 | 0.410 | 0.564 | 0.720 | 0.940 | 0.48 | 0.22 | 1.00 |
| 366 | 6117702XG1761E | Avda. de los Ángeles, 3, 5        | 616025 | 4171500 | 539  | 3  | 1970 | 1 | RC1 | 0.480 | 0.670 | 0.824 | 0.980 | 1.200 | 1.52 | 0.80 | 2.53 |
| 367 | 5214016XG1751C | C/Turbinto, 1                     | 615104 | 4171183 | 2801 | 4  | 2007 | 1 | RC1 | 0.260 | 0.450 | 0.604 | 0.760 | 0.980 | 0.58 | 0.27 | 1.18 |
| 368 | 4818611XG1741H | Ctra. Caravaca, 46                | 614671 | 4171616 | 524  | 4  | 2007 | 1 | RC1 | 0.140 | 0.330 | 0.484 | 0.640 | 0.860 | 0.32 | 0.15 | 0.69 |
| 369 | 4698108XG1649H | C/Jerónimo Santa Fe, 33           | 614507 | 4169674 | 2640 | 4  | 2005 | 1 | RC1 | 0.220 | 0.410 | 0.564 | 0.720 | 0.940 | 0.48 | 0.22 | 1.00 |
| 370 | 6118201XG1761G | C/Musso Fontes, 1                 | 616028 | 4171666 | 278  | 3  | 1970 | 1 | RC1 | 0.400 | 0.590 | 0.744 | 0.900 | 1.120 | 1.10 | 0.55 | 1.99 |
| 371 | 5814301XG1751D | C/Teresa de Calcuta, 4            | 615730 | 4171265 | 7045 | 4  | 2007 | 1 | RC1 | 0.340 | 0.530 | 0.684 | 0.840 | 1.060 | 0.85 | 0.41 | 1.62 |
| 372 | 5315204XG1751E | C/Abellana, 4                     | 615238 | 4171363 | 250  | 3  | 1997 | 1 | RC1 | 0.200 | 0.390 | 0.544 | 0.700 | 0.920 | 0.44 | 0.20 | 0.91 |
| 373 | 4603008XG1740D | C/Redón, 26                       | 614490 | 4170103 | 293  | 1  | 1950 | 1 | RC1 | 0.340 | 0.530 | 0.684 | 0.840 | 1.060 | 0.85 | 0.41 | 1.62 |
| 374 | 5212013XG1751A | C/Carril de Caldereros, 45        | 615145 | 4170940 | 126  | 4  | 1998 | 1 | RC1 | 0.420 | 0.610 | 0.764 | 0.920 | 1.140 | 1.20 | 0.60 | 2.12 |
| 375 | 6216006XG1761E | Avda. Europa, 35                  | 616090 | 4171376 | 1550 | 4  | 1993 | 1 | RC1 | 0.500 | 0.690 | 0.844 | 1.000 | 1.220 | 1.64 | 0.87 | 2.66 |
| 376 | 5314005XG1751C | Avda. Rafael Maroto, 7            | 615281 | 4171183 | 1233 | 4  | 2003 | 1 | RC1 | 0.240 | 0.430 | 0.584 | 0.740 | 0.960 | 0.53 | 0.24 | 1.09 |
| 377 | 4395306XG1649E | C/Guitarrista Cano, 11            | 614252 | 4169372 | 216  | 2  | 1956 | 1 | RC1 | 0.340 | 0.530 | 0.684 | 0.840 | 1.060 | 0.85 | 0.41 | 1.62 |
| 378 | 5105010XG1750E | Avda. Juan Carlos I, 34           | 614928 | 4170363 | 723  | 7  | 2001 | 1 | RC1 | 0.140 | 0.330 | 0.484 | 0.640 | 0.860 | 0.32 | 0.15 | 0.69 |
| 379 | 4905006XG1740F | Avda. Juan Carlos I, 15           | 614801 | 4170246 | 137  | 4  | 1970 | 1 | RC1 | 0.320 | 0.510 | 0.664 | 0.820 | 1.040 | 0.78 | 0.37 | 1.50 |
| 380 | 4600022XG1740B | C/Pérez Casas, 65                 | 614462 | 4169782 | 412  | 4  | 1994 | 1 | RC1 | 0.240 | 0.430 | 0.584 | 0.740 | 0.960 | 0.53 | 0.24 | 1.09 |
| 381 | 6216236XG1761E | Avda. Fuerzas Armadas, 9          | 616088 | 4171453 | 711  | 5  | 2009 | 1 | RC1 | 0.340 | 0.530 | 0.684 | 0.840 | 1.060 | 0.85 | 0.41 | 1.62 |
| 382 | 5000802XG1750A | Alameda de Cervantes, 13          | 614921 | 4169839 | 828  | 5  | 1975 | 1 | RC1 | 0.300 | 0.490 | 0.644 | 0.800 | 1.020 | 0.71 | 0.33 | 1.39 |
| 383 | 5108022XG1750G | C/Lope Gisbert, 20                | 614911 | 4170662 | 332  | 4  | 1965 | 1 | RC1 | 0.300 | 0.490 | 0.644 | 0.800 | 1.020 | 0.71 | 0.33 | 1.39 |
| 384 | 4801016XG1740B | C/Fray Diego de Cádiz, 21         | 614683 | 4169696 | 2676 | 3  | 1986 | 1 | RC1 | 0.500 | 0.690 | 0.844 | 1.000 | 1.220 | 1.64 | 0.87 | 2.66 |
| 385 | 4501507XG1740B | C/Pérez Casas, 32                 | 614463 | 4169913 | 217  | 4  | 1970 | 1 | RC1 | 0.340 | 0.530 | 0.684 | 0.840 | 1.060 | 0.85 | 0.41 | 1.62 |
| 386 | 5000801XG1750A | Alameda de Cervantes, 11          | 614909 | 4169863 | 420  | 10 | 1975 | 1 | RC1 | 0.420 | 0.610 | 0.764 | 0.920 | 1.140 | 1.20 | 0.60 | 2.12 |
| 387 | 5309009XG1750G | Avda. Juan Carlos I, 74           | 615166 | 4170788 | 520  | 7  | 1990 | 1 | RC1 | 0.400 | 0.590 | 0.744 | 0.900 | 1.120 | 1.10 | 0.55 | 1.99 |
| 388 | 6118504XG1761G | Avda. de los Ángeles, 14          | 616037 | 4171605 | 353  | 3  | 1976 | 1 | RC1 | 0.460 | 0.650 | 0.804 | 0.960 | 1.180 | 1.41 | 0.73 | 2.39 |
| 389 | 6114306XG1761C | Avda. Europa, 50                  | 616042 | 4171307 | 298  | 4  | 1993 | 1 | RC1 | 0.220 | 0.410 | 0.564 | 0.720 | 0.940 | 0.48 | 0.22 | 1.00 |
| 390 | 4808301XG1740H | C/Rubira, 10                      | 614762 | 4170707 | 96   | 3  | 1986 | 1 | RC1 | 0.360 | 0.550 | 0.704 | 0.860 | 1.080 | 0.93 | 0.45 | 1.74 |
| 391 | 4804009XG1740D | C/Abenhalaj, 15                   | 614680 | 4170157 | 214  | 4  | 1968 | 1 | RC1 | 0.300 | 0.490 | 0.644 | 0.800 | 1.020 | 0.71 | 0.33 | 1.39 |
| 392 | 5395009XG1659E | Alameda de Cervantes, 77          | 615163 | 4169327 | 354  | 2  | 1965 | 1 | RC1 | 0.320 | 0.510 | 0.664 | 0.820 | 1.040 | 0.78 | 0.37 | 1.50 |
| 393 | 6116201XG1761E | Avda. de los Ángeles, 1           | 616029 | 4171476 | 290  | 3  | 1975 | 1 | RC1 | 0.400 | 0.590 | 0.744 | 0.900 | 1.120 | 1.10 | 0.55 | 1.99 |
| 394 | 4908002XG1740H | C/Álamo, 22                       | 614755 | 4170618 | 378  | 4  | 1985 | 1 | RC1 | 0.220 | 0.410 | 0.564 | 0.720 | 0.940 | 0.48 | 0.22 | 1.00 |
| 395 | 5311101XG1751A | Avda. Juan Carlos I, 63           | 615157 | 4170843 | 255  | 3  | 1963 | 1 | RC1 | 0.300 | 0.490 | 0.644 | 0.800 | 1.020 | 0.71 | 0.33 | 1.39 |
| 396 | 4495018XG1649E | C/Camino Viejo del Puerto, 56     | 614285 | 4169204 | 166  | 4  | 2000 | 1 | RC1 | 0.360 | 0.550 | 0.704 | 0.860 | 1.080 | 0.93 | 0.45 | 1.74 |
| 397 | 4395605XG1649E | C/Guitarrista Cano, 13            | 614212 | 4169304 | 218  | 2  | 1956 | 1 | RC1 | 0.440 | 0.630 | 0.784 | 0.940 | 1.160 | 1.30 | 0.66 | 2.26 |

|     |                |                           |        |         |      |   |      |   |     |       |       |       |       |       |      |      |      |
|-----|----------------|---------------------------|--------|---------|------|---|------|---|-----|-------|-------|-------|-------|-------|------|------|------|
| 398 | 4909701XG1740H | C/Corredera, 55           | 614826 | 4170690 | 775  | 4 | 1981 | 1 | RC1 | 0.220 | 0.410 | 0.564 | 0.720 | 0.940 | 0.48 | 0.22 | 1.00 |
| 399 | 4805206XG1740F | C/Príncipe Alfonso, 8     | 614731 | 4170356 | 168  | 4 | 1963 | 1 | RC1 | 0.340 | 0.530 | 0.684 | 0.840 | 1.060 | 0.85 | 0.41 | 1.62 |
| 400 | 4293201XG1649C | C/Zapateros, 4            | 614130 | 4169188 | 323  | 4 | 1975 | 1 | RC1 | 0.380 | 0.570 | 0.724 | 0.880 | 1.100 | 1.01 | 0.50 | 1.86 |
| 401 | 4604613XG1740D | C/Vicente Lunell, 6       | 614517 | 4170176 | 105  | 2 | 1984 | 1 | RC1 | 0.340 | 0.530 | 0.684 | 0.840 | 1.060 | 0.85 | 0.41 | 1.62 |
| 402 | 4901801XG1740B | Alameda de Cervantes, 14  | 614793 | 4169951 | 1117 | 8 | 1978 | 1 | RC1 | 0.280 | 0.470 | 0.624 | 0.780 | 1.000 | 0.64 | 0.30 | 1.28 |
| 403 | 4598250XG1649H | C/Pérez Casas, 85         | 614431 | 4169697 | 149  | 4 | 1968 | 1 | RC1 | 0.320 | 0.510 | 0.664 | 0.820 | 1.040 | 0.78 | 0.37 | 1.50 |
| 404 | 4905005XG1740F | Avda. Juan Carlos I, 17   | 614804 | 4170259 | 516  | 7 | 1991 | 1 | RC1 | 0.240 | 0.430 | 0.584 | 0.740 | 0.960 | 0.53 | 0.24 | 1.09 |
| 405 | 4806706XG1740F | C/Obispo Albuquerque, 3   | 614709 | 4170396 | 175  | 3 | 1960 | 1 | RC1 | 0.280 | 0.470 | 0.624 | 0.780 | 1.000 | 0.64 | 0.30 | 1.28 |
| 406 | 5110028XG1751A | C/Carril de Caldereros, 6 | 615007 | 4170816 | 964  | 3 | 1995 | 1 | RC1 | 0.340 | 0.530 | 0.684 | 0.840 | 1.060 | 0.85 | 0.41 | 1.62 |
